# Supplementary material for: Multi-Omics Analysis Reveals a Regulatory Network of ZmCCT During Maize Resistance to Gibberella Stalk Rot at the Early Stage
Source: Front Plant Sci. 2022 Jun 23;13:917493. doi: 10.3389/fpls.2022.917493 (PMC9260664; doi:10.3389/fpls.2022.917493)
Supplement: Supplementary file 6 [file Table_6.xlsx]

## Sheet: 0 hpi
Table S6 DEGs identified in transcriptomics.
name	diffexp_log2fc_DTE_0h.vs.TE_0h	Arabidopsis.thaliana.gene.stable.ID	Oryza.sativa.Japonica.Group.gene.stable.ID	annotation_ATR	gene_names_ATR	Gene.symbol.synonym.s._rice	classification	Gene.name.synonym.s._rice	Trait.Ontology_rice
Zm00001eb150400	10.0367	AT2G26850	Os01g0806200	F-box family protein	NA	FBXO45		F-box protein 45
Zm00001eb331460	5.01275	AT2G38440	Os07g0691700	SCAR homolog 2	ATSCAR2	SCAR4	nodulation	Suppressor of cAMP receptor 4
Zm00001eb314610	3.2322	AT1G05010	Os09g0451400	ethylene-forming enzyme	ACO4	ACO1	ethylene signaling	ACC oxidase 1, ACC oxidase
Zm00001eb122240	2.91762	AT4G14090	Os01g0179600	UDP-Glycosyltransferase superfamily protein	NA	UGT75K1	photoperiod/zeaxanthin	Chloroplastic crocetin glucosyltransferase, glycosylation of crocetin to crocin
Zm00001eb122890	2.86481	AT3G01550	Os01g0172100	phosphoenolpyruvate (pep)/phosphate translocator 2	ATPPT2	AtPPT2/PPT3	photosynthesis	Phosphoenolpyruvate (pep)/phosphate translocator 2
Zm00001eb428570	1.74158	AT5G51750	Os04g0573300	subtilase 1.3	ATSBT1.3	Sub45		Subtilisin 45
Zm00001eb048860	1.42336	AT1G61890	Os03g0572900	MATE efflux family protein	NA	PEZ2		phenolics efflux zero 2, phenolics efflux transporter 2
Zm00001eb111670	1.23803	AT2G39050	Os07g0683600	hydroxyproline-rich glycoprotein family protein	NA	EULD2	stress response	EUL-related lectin D2	TO:0000615 - abscisic acid sensitivity, TO:0000172 - jasmonic acid sensitivity, TO:0000276 - drought tolerance, TO:0006001 - salt tolerance, TO:0000424 - brown planthopper resistance, TO:0000175 - bacterial blight disease resistance, TO:0000074 - blast disease
Zm00001eb393670	1.15195	AT4G11880	Os10g0536100	AGAMOUS-like 14	AGL14	AGL14/MADS56	photoperiod/flowering/TFs	MADS box gene56, MADS-box transcription factor 56	TO:0000621 - inflorescence development trait, TO:0002616 - flowering time
Zm00001eb253150	-1.05648	AT3G07650	Os02g0724000	CONSTANS-like 9	COL9	COL9/CCT family	photoperiod/COL9 is regulated by the circadian clock in the photoperiod pathway.	CONSTANS-like gene N, B-box-containing protein 7, CCT domain-containing gene 8, CCT (CO, CO-LIKE and TOC1) domain protein 8, CCT domain protein 8	TO:0006001 - salt tolerance, TO:0000303 - cold tolerance, TO:0000276 - drought tolerance, TO:0000172 - jasmonic acid sensitivity, TO:0000166 - gibberellic acid sensitivity, TO:0000224 - iron sensitivity
Zm00001eb107910	-1.11162	AT1G50600	Os07g0583600	scarecrow-like 5	SCL5	OsCIGR2/OsGRAS-36	GA-responsive TFs	Chitin-inducible gibberellin-responsive protein 2, GA response modulator protein, GRAS protein 36
Zm00001eb141570	-1.12927	AT2G41510	Os01g0940000	cytokinin oxidase/dehydrogenase 1		AtCKX1/OsCKX4	cytokinin signaling/auxin signaling	Cytokinin oxidase 4	TO:0000011 - nitrogen sensitivity, TO:0000167 - cytokinin sensitivity, TO:0000163 - auxin sensitivity, TO:0000401 - plant growth hormone sensitivity, TO:0000172 - jasmonic acid sensitivity, TO:0000148 - viral disease resistance, TO:0000020 - black streak dwarf virus resistance
Zm00001eb014050	-1.15915	AT1G56300	Os03g0300600	Chaperone DnaJ-domain superfamily protein	NA	OsDjC28	ABA signaling/salt resistance	DnaJ domain protein C28
Zm00001eb232400	-1.20589	AT5G10650	Os02g0150700	RING/U-box superfamily protein	NA	OsRFP	ABA signaling/salt resistance	RING Finger Protein	TO:0006001 - salt tolerance
Zm00001eb283570	-1.2585	AT5G25880	Os05g0186300	NADP-malic enzyme 3	AtNADP-ME3	NADP-ME3/OscytME2	C4 photosynthesis/rice blast resistance	cytosolic NADP malic enzyme 2	TO:0006001 - salt tolerance
Zm00001eb143060	-1.27596	AT1G67310	Os01g0923600	Calmodulin-binding transcription activator protein with CG-1 and Ankyrin domains	NA	CAMTA	SA signaling/Calcium signaling/CAMTA transcription activator	CaM-binding transcription factor homolog, master regulators of salicylic acid (SA)-mediated immunity, repressing the biosynthesis of SA in healthy plants.	TO:0000303 - cold tolerance
Zm00001eb110040	-1.28284	AT2G46950	Os07g0635500	cytochrome P450, family 709, subfamily B, polypeptide 2	CYP709B2	CYP709B2/OsCYP709C5	ABA signaling/salt resistance	Cytochrome P450 709C5
Zm00001eb110050	-1.33805	AT2G46950	Os07g0635500	cytochrome P450, family 709, subfamily B, polypeptide 2	CYP709B2	CYP709B2/OsCYP709C5	ABA signaling/salt resistance	Cytochrome P450 709C5
Zm00001eb061880	-1.35103	AT3G57520	Os03g0808900	seed imbibition 2	AtSIP2	AtSIP2	Raffinose metabolism/abiotic stress response		TO:0002649 - pesticide sensitivity
Zm00001eb016120	-1.40776	AT2G40520	Os03g0336700	Nucleotidyltransferase family protein	NA	OsNTP6	ABA signaling/salt resistance	nucleotidyl transferase protein 6	TO:0000259 - heat tolerance, TO:0000303 - cold tolerance, TO:0000615 - abscisic acid sensitivity, TO:0006001 - salt tolerance
Zm00001eb405590	-1.47822	AT1G69490	Os11g0126900	NAC-like, activated by AP3/PI	ANAC029	NAC10	ABA signaling/salt resistance	NAC domain-containing protein 10, NAC domain-containing protein 122	TO:0006001 - salt tolerance, TO:0000172 - jasmonic acid sensitivity, TO:0000615 - abscisic acid sensitivity, TO:0000276 - drought tolerance, TO:0000148 - viral disease resistance, TO:0000020 - black streak dwarf virus resistance, TO:0000213 - rice grassy stunt 1 and 2 virus resistance, TO:0000386 - rice ragged stunt virus resistance, TO:0000058 - herbicide sensitivity
Zm00001eb025190	-1.52524	AT1G32090	Os10g0579100	early-responsive to dehydration stress protein (ERD4)	NA	ERD4	ABA signaling/salt resistance	Hyperosmolality-gated calcium-permeable channel 1.4, DUF221 Domain containing Protein 8	TO:0006001 - salt tolerance, TO:0000615 - abscisic acid sensitivity, TO:0000276 - drought tolerance, TO:0000653 - seed development trait
Zm00001eb309590	-1.55804	AT1G68550	Os09g0309700	Integrase-type DNA-binding superfamily protein	NA	OsERF#109, OsERF109, AP2/EREBP#063, AP2/EREBP63, DLN223, OsDLN223	ethylene signaling	ethylene response factor 109, APETALA2/ethylene-responsive element binding protein 63, DLN repressor 223, DLN motif protein 223
Zm00001eb251960	-1.59788	AT5G45340	Os02g0703600	cytochrome P450, family 707, subfamily A, polypeptide 3	CYP707A3	CYP707A3/ABA8OX1	ABA signaling/stress resistance	Abscisic acid 8'-hydroxylase 1, ABA 8'-hydroxylase 1 ; Cytochrome P450 707A5, ABA 8'-hydroxylase1	TO:0000175 - bacterial blight disease resistance, TO:0000103 - deepwater stress, TO:0000276 - drought tolerance, TO:0000615 - abscisic acid sensitivity, TO:0000478 - abscisic acid concentration, TO:0000286 - submergence sensitivity, TO:0000303 - cold tolerance
Zm00001eb315010	-1.61373	AT1G47380	Os09g0459600	Protein phosphatase 2C family protein	NA	OsPP2C69, PP2C69, OsPP109	ABA signaling/stress resistance	protein phosphatase 2C69, protein phosphatase 2C 69, protein phosphatase 109
Zm00001eb157830	-1.79319	AT3G61590	Os01g0659900	Galactose oxidase/kelch repeat superfamily protein	HS	OsFBK1	cell wall/thickening	F-box protein 33, F-box Kelch 1	TO:0000656 - root development trait, TO:0000276 - drought tolerance, TO:0000163 - auxin sensitivity
Zm00001eb040650	-1.81069	AT5G20820	Os08g0452500	SAUR-like auxin-responsive protein family	NA	OsSAUR33	auxin signaling	Small auxin-up RNA 33
Zm00001eb122300	-1.97943	AT3G62160	Os01g0179000	HXXXD-type acyl-transferase family protein	NA	GPAT6	cell wall/cutin formation	acyltransferase 6
Zm00001eb154780	-7.85493	AT1G16670	Os12g0611100	Protein kinase superfamily protein	NA	OsRLCK373	ABA signaling/salt resistance	Receptor-like Cytoplasmic Kinase 373	TO:0006001 - salt tolerance, TO:0000653 - seed development trait, TO:0000621 - inflorescence development trait, TO:0000276 - drought tolerance, TO:0000074 - blast disease

## Sheet: 1 hpi
name	maize	gene_symbol	diffexp_log2fc_DTE_1h.vs.TE_1h	Arabidopsis.thaliana.gene.stable.ID	Oryza.sativa.Japonica.Group.gene.stable.ID	annotation_ATR	gene_names_ATR	Gene.symbol.synonym.s._rice	classification	Gene.name.synonym.s._rice	Trait.Ontology_rice
Zm00001eb329480	103633510	LOC103633510	8.9157	AT5G19160	Os07g0656000	TRICHOME BIREFRINGENCE-LIKE 11	TBL11	OsTBL24, TBL24		trichome birefringence-like 24
Zm00001eb047360	100382618	TIDP2927	5.54772	AT1G20190	Os10g0439200	expansin 11	ATEXP11
Zm00001eb137340	103650569	LOC103650569	3.62372	AT4G27970	Os07g0181100	SLAC1 homologue 2	SLAH2	SLAC		SLOW ANION CHANNEL
Zm00001eb371370	100194238	LOC100194238	3.55624	AT5G25610	Os01g0733500	BURP domain-containing protein	ATRD22	RD22, OsBURP03, OsBURP3		BURP domain-containing protein 3
Zm00001eb331460	103633599	LOC103633599	3.46562	AT2G38440	Os07g0691700	SCAR homolog 2	ATSCAR2	OsSCAR4, SCAR4		Suppressor of cAMP Receptor-Like Protein 4, SCAR-like Protein 4, suppressor of cAMP receptor 4
Zm00001eb229700	103626517	LOC103626517	3.19361	AT4G28650	Os02g0111800	Leucine-rich repeat transmembrane protein kinase family protein	NA	OsCLVATA, CLVATA		PXL1 LRR receptor-like protein kinase
Zm00001eb071080	100274033	LOC100274033	3.11197	AT1G79460	Os04g0611700	Terpenoid cyclases/Protein prenyltransferases superfamily protein	ATKS	OsKS3, OSKS3, KS3, KSL3, OsKSL3, OsKS2, KS2, OsTPS25		rice ent-kaurene synthase3, Ent-kaurene synthase 3, Ent-kaurene synthase-like 3, kaurene synthase like-3, Ent-kaurene synthase-like 2, terpene synthase 25
Zm00001eb013810	100279407	LOC100279407	3.05861	AT2G40370	Os03g0297900	laccase 5	LAC5	OsLAC12	ROS	laccase 12
Zm00001eb071090	541974	tps1	2.79599	AT1G79460	Os04g0611700	Terpenoid cyclases/Protein prenyltransferases superfamily protein	ATKS	OsKS3, OSKS3, KS3, KSL3, OsKSL3, OsKS2, KS2, OsTPS25		rice ent-kaurene synthase3, Ent-kaurene synthase 3, Ent-kaurene synthase-like 3, kaurene synthase like-3, Ent-kaurene synthase-like 2, terpene synthase 25
Zm00001eb128760	103650011	LOC103650011	2.5704	AT5G17800	Os01g0274800	myb domain protein 56	AtMYB56	csa, OsCSA			TO:0000276 - drought tolerance, TO:0002677 - brassinosteroid sensitivity
Zm00001eb412940	100285777	LOC100285777	2.54076	AT3G01760	Os08g0127100	Transmembrane amino acid transporter family protein	NA	OsHT, OsLHT1, LHT1		Histidine Transporter, lysine and histidine transporter 1, lysine-histidine-like transporter 1, Lysine/Histidine transporter 1	TO:0000447 - filled grain number, TO:0000455 - seed set percent, TO:0000371 - yield trait, TO:0000396 - grain yield, TO:0000207 - plant height, TO:0000576 - stem length, TO:0000346 - tiller number, TO:0000227 - root length
Zm00001eb291850	107548102	LOC107548102	2.48328	AT3G01190	Os05g0499300	Peroxidase superfamily protein	NA	Pox1(Px,Pe), PRX74, Px, Pe, Pox1, prx74	ROS	Peroxidase1, Peroxidase 1 precursor, Peroxidase 1, Peroxidase-1, class III peroxidase 74
Zm00001eb003660	103631713	LOC103631713	2.47902	AT4G28650	Os03g0145102	Leucine-rich repeat transmembrane protein kinase family protein	NA	OsRLCK99	RLCKs	Receptor-like Cytoplasmic Kinase 99
Zm00001eb312010	103632716	LOC103632716	2.46668	AT2G01770	Os09g0396900	vacuolar iron transporter 1	ATVIT1	OsVIT2, OsVIT1, VIT2, VIT1		Vacuolar Iron Transporter 2, vacuolar Fe and Mn transporter 1
Zm00001eb406600	103640750	LOC103640750	2.29815	AT2G27690	Os11g0151400	cytochrome P450, family 94, subfamily C, polypeptide 1	CYP94C1	OsCYP94C2, CYP94C2a, OsCYP94C2a		Cytochrome P450 94C2	TO:0006001 - salt tolerance
Zm00001eb422410	100382033	pco080795	2.26673	AT3G50990	Os04g0423800	Peroxidase superfamily protein	NA	prx54	ROS	class III peroxidase 54
Zm00001eb250590	100501893	LOC100501893	2.25915	AT4G11810	Os02g0678200	Major Facilitator Superfamily with SPX (SYG1/Pho81/XPR1) domain-containing protein	NA	OsSPX-MFS2, SPX-MFS2	seed maturation	SPX-MFS protein 2	TO:0002661 - seed maturation
Zm00001eb122890	103649694	LOC103649694	2.23237	AT3G01550	Os01g0172100	phosphoenolpyruvate (pep)/phosphate translocator 2	ATPPT2	OsPPT3
Zm00001eb000390	103630501	LOC103630501	2.20992	AT1G12110	Os03g0103000	nitrate transporter 1.1	ATNRT1	OsNRT1.1C		nitrate transporter 1.1C
Zm00001eb359490	606432	pht6	2.20304	AT4G08878	Os01g0657100	Major facilitator superfamily protein	NA	OsPT11, PHT1-11, OsPht1;11, ORYsa;PHT1;11	auxin signaling	Inorganic phosphate transporter 1-11, PHOSPHATE TRANSPORTER1;11	TO:0000163 - auxin sensitivity, TO:0000167 - cytokinin sensitivity, TO:0000166 - gibberellic acid sensitivity, TO:0000615 - abscisic acid sensitivity
Zm00001eb000370	103630483	LOC103630483	2.19132	AT3G60570	Os03g0102500	expansin B5	ATEXPB5
Zm00001eb309110	100274054	LOC100274054	2.05969	AT4G12730	Os09g0248100	FASCICLIN-like arabinogalactan 2	FLA2	OsFLA11	GA signaling	fasciclin-like AGP 11, fasciclin-like arabinogalactan protein 11	TO:0000166 - gibberellic acid sensitivity, TO:0000615 - abscisic acid sensitivity
Zm00001eb083140	100216859	LOC100216859	1.95464	AT3G50990	Os04g0423800	Peroxidase superfamily protein	NA	prx54	ROS	class III peroxidase 54
Zm00001eb006480	542034	TIDP3516	1.95226	AT2G22540	Os03g0186600	K-box region and MADS-box transcription factor family protein	AGL22	OsMADS47, OsMDP1, MDP, MDP1	TFs	MADS box gene47, MADS-domain-contaiing protein1, MADS-domain-containing protein 1, MADS-box transcription factor 47, MADS-DOMAIN-CONTAIING PROTEIN1, MADS domain protein 1	TO:0000621 - inflorescence development trait, TO:0000227 - root length, TO:0000401 - plant growth hormone sensitivity, TO:0000240 - sterile lemma length, TO:0000206 - leaf angle, TO:0006022 - floral organ development trait
Zm00001eb197370	100193310	LOC100193310	1.88429	AT3G11580	Os11g0156000	AP2/B3-like transcriptional factor family protein	NA	OsRAP2.8	ethylene signaling	RELATED-TO-AP28	TO:0000173 - ethylene sensitivity
Zm00001eb199400	103654469	LOC103654469	1.86927	AT4G26540	Os08g0493800	Leucine-rich repeat receptor-like protein kinase family protein	NA	OsRLCK256	ethylene signaling	Receptor-like Cytoplasmic Kinase 256
Zm00001eb101560	103647524	LOC103647524	1.72708	AT4G26540	Os09g0479200	Leucine-rich repeat receptor-like protein kinase family protein	NA	OsRLCK275	ethylene signaling	Receptor-like Cytoplasmic Kinase 275
Zm00001eb075710	100274424	LOC100274424	1.70082	AT1G13250	Os04g0530900	galacturonosyltransferase-like 3	GATL3	OsGATL5		galacturonosyltransferase-like 5	TO:0000303 - cold tolerance
Zm00001eb048540	100126887	cyp8	1.69541	AT5G09970	Os10g0403000	cytochrome P450, family 78, subfamily A, polypeptide 7	CYP78A7	pla1, OsPLA1, plt1, CYP78A11	GA signaling	plastochron1, plastochron 1, plastochron-1, Cytochrome P450 78A11, Protein PLASTOCHRON1	TO:0000166 - gibberellic acid sensitivity, TO:0000621 - inflorescence development trait, TO:0000369 - vegetative growth time, TO:0000730 - mitotic cell cycle trait, TO:0000659 - phyllochron, TO:0002638 - shoot meristem development, TO:0000050 - inflorescence branching
Zm00001eb342070	103635254	LOC103635254	1.67971	AT3G50990	Os01g0543100	Peroxidase superfamily protein	NA	prx17	ROS	class III peroxidase 17
Zm00001eb088800	100216819	LOC100216819	1.64548	AT2G21730	Os04g0229100	cinnamyl alcohol dehydrogenase homolog 2	ATCAD2	OsCAD6	lignin biosynthesis	Cinnamyl alcohol dehydrogenase 6	TO:0000160 - UV light sensitivity, TO:0000175 - bacterial blight disease resistance	lignin biosynthesis
Zm00001eb164090	100501815	LOC100501815	1.59332	AT2G27690	Os11g0151400	cytochrome P450, family 94, subfamily C, polypeptide 1	CYP94C1	OsCYP94C2, CYP94C2a, OsCYP94C2a		Cytochrome P450 94C2	TO:0006001 - salt tolerance
Zm00001eb187910	103653944	LOC103653944	1.58465	AT1G65060	Os02g0697400	4-coumarate:CoA ligase 3	4CL3	Os4CL2	Phenylpropanoid metabolism	4-coumarate:coenzyme A ligase 2, 4-coumarate-CoA ligase 2		Phenylpropanoid metabolism
Zm00001eb225230	100283382	LOC100283382	1.58292	AT3G21770	Os06g0681600	Peroxidase superfamily protein	NA	prx89		class III peroxidase 89
Zm00001eb144960	541856	lox1	1.57362	AT1G55020	Os03g0738600	lipoxygenase 1	ATLOX1	OsLOX-L2, LOX1.1, LOX L-2, LOX-2	ROS	Lipoxygenase 2, Lipoxygenase L-2
Zm00001eb239520	103627063	LOC103627063	1.54619	AT4G35300	Os02g0229400	tonoplast monosaccharide transporter2	TMT2	OsTMT2			TO:0000333 - sugar content
Zm00001eb144930	100037802	lox2	1.50722	AT1G55020	Os03g0738600	lipoxygenase 1	ATLOX1	OsLOX-L2, LOX1.1, LOX L-2, LOX-2	ROS	Lipoxygenase 2, Lipoxygenase L-2
Zm00001eb121190	107521951	LOC107521951	1.50128	AT4G26200	Os05g0319200	1-amino-cyclopropane-1-carboxylate synthase 7	ACS7	OsACS4, OS-ACS4		ACC synthase 4, 1-aminocyclopropane-1-carboxylic acid synthase 4
Zm00001eb297400	100194047	LOC100194047	1.49975	AT5G06300	Os05g0591600	Putative lysine decarboxylase family protein	NA	LOGL8		LOG LIKE phosphoribohydrolase 8, LOG LIKE 8
Zm00001eb071880	100281353	LOC100281353	1.47352	AT5G64210	Os04g0600300	alternative oxidase 2	AOX2	AOX1b, OsAOX1b	ROS	alternative oxidase-1b	TO:0000432 - temperature response trait
Zm00001eb195200	100192105	LOC100192105	1.42269	AT5G58390	Os12g0112000	Peroxidase superfamily protein	NA	Pox, prx135, OsPRX1	ROS	Peroxidase, class III peroxidase 135
Zm00001eb006610	103631829	LOC103631829	1.39877	AT4G24390	Os03g0187500	RNI-like superfamily protein	NA	Os_F0701, OsAFB6, AFB6	auxin signaling	Auxin-signaling F-Box 6	TO:0000547 - primary branch number, TO:0000396 - grain yield, TO:0000040 - panicle length, TO:0000227 - root length, TO:0000346 - tiller number, TO:0000397 - grain size, TO:0000137 - days to heading, TO:0002672 - auxin content, TO:0002660 - cytokinin content, TO:0006032 - panicle size, TO:0000456 - spikelet number, TO:0000557 - secondary branch number
Zm00001eb361620	100191227	LOC100191227	1.39596	AT1G17710	Os01g0720400	Pyridoxal phosphate phosphatase-related protein	NA	OsACP1, ACP1		acid phosphatase 1
Zm00001eb026860	100282340	LOC100282340	1.37722	AT3G13662	Os11g0644700	Disease resistance-responsive (dirigent-like protein) family protein	NA			dirigent
Zm00001eb312070	100273454	LOC100273454	1.37698	AT4G37990	Os09g0400400	elicitor-activated gene 3-2	ATCAD8	OsCAD8D	lignin biosynthesis	Cinnamyl alcohol dehydrogenase 8D	lignin biosynthesis
Zm00001eb418230	100283644	IDP582	1.3748	AT3G50210	Os09g0245500	2-oxoglutarate (2OG) and Fe(II)-dependent oxygenase superfamily protein	NA	2-ODD33, Os2-ODD33, Os2ODD33		2-oxoglutarate-dependent dioxygenase 33
Zm00001eb130500	100280285	LOC100280285	1.34218	AT4G02300	Os01g0312500	Plant invertase/pectin methylesterase inhibitor superfamily	NA	OsPME3		pectin methylesterase 3
Zm00001eb389440	100502532	LOC100502532	1.33958	AT3G27170	Os12g0438600	chloride channel B	ATCLC-B	OsCBSCLC7		cystathionine b-synthase domain containing protein OsCBSCLC7, CBS domain containing protein OsCBSCLC7, CBS domain containing protein 7
Zm00001eb076600	100281579	LOC100281579	1.30326	AT1G65610	Os04g0497200	Six-hairpin glycosidases superfamily protein	ATGH9A2	OsGLU3, OsGH9A2, GLU3, GH9A2		endo-1, 4-b-D-glucanase 3, glycoside hydrolase OsGH9A2, glycoside hydrolase 9A2	TO:0000015 - oxygen sensitivity
Zm00001eb206350	103654853	LOC103654853	1.29104	AT3G28415	Os02g0190300	ABC transporter family protein	NA	OsABCB9, OsPGP9, OsISC33	auxin signaling	ABC transporter superfamily ABCB subgroup member 9, P-Glycoprotein 9, Iron-sulfur cluster protein 33	TO:0000163 - auxin sensitivity, TO:0000276 - drought tolerance, TO:0006001 - salt tolerance, TO:0000615 - abscisic acid sensitivity
Zm00001eb418920	100383623	LOC100383623	1.28318	AT1G27600	Os04g0103100	Nucleotide-diphospho-sugar transferases superfamily protein	I9H	OsGT43H		glycosyltransferase family GT43 member H
Zm00001eb247650	103627433	LOC103627433	1.27614	AT3G10340	Os05g0427400	phenylalanine ammonia-lyase 4	PAL4	OsPAL04, PAL04, PAL, OsPAL7, PAL7	PALs	Phenylalanine ammonia lyase	TO:0000074 - blast disease, TO:0000432 - temperature response trait
Zm00001eb223910	107648857	LOC107648857	1.26681	AT5G60660	Os03g0861300	plasma membrane intrinsic protein 2;4	PIP2;4	OsPIP2;8, PIP2.8, PIP2-8, OsPIP2-7		Probable aquaporin PIP2.8, Probable aquaporin PIP2-8, Plasma membrane intrinsic protein 2-8	TO:0000095 - osmotic response sensitivity, TO:0000276 - drought tolerance, TO:0006001 - salt tolerance, TO:0000615 - abscisic acid sensitivity
Zm00001eb257590	100274751	LOC100274751	1.26398	AT4G30440	Os02g0791500	UDP-D-glucuronate 4-epimerase 1	GAE1	OsUGlcAE3		UDP-glucuronic acid 4-epimerase 3
Zm00001eb174520	100193686	LOC100193686	1.22426	AT1G43020	Os08g0515700	Protein of unknown function, DUF547	NA	OsTCF		ternary complex factor
Zm00001eb098340	100279397	LOC100279397	1.20573	AT3G61580	Os09g0338500	Fatty acid/sphingolipid desaturase	NA	OsSLD	sphingolipid	sphingolipid LCB delta8 desaturase, sphingolipid long-chain base delta8 desaturase
Zm00001eb384970	100273169	LOC100273169	1.20338	AT5G21100	Os06g0567200	Plant L-ascorbate oxidase	NA	OsAAO1		AO-like, AO homolog, ASCORBATE OXIDASE homolog, ascorbate oxidase 1	TO:0006001 - salt tolerance, TO:0000276 - drought tolerance, TO:0000303 - cold tolerance
Zm00001eb186570	541894	tip2a	1.19956	AT5G47450	Os02g0658100	tonoplast intrinsic protein 2;3	ATTIP2;3	OsTIP2;1, TIP2-1, TIP2		tonoplast intrinsic protein 2;1, Probable aquaporin TIP2-1, Tonoplast intrinsic protein 2-1
Zm00001eb129520	100382453	LOC100382453	1.16443	AT2G43010	Os01g0286100	phytochrome interacting factor 4	PIF4	OsPIL15, OsbHLH105, PIF3, OsPIF3	auxin signaling	phytochrome-interacting factor-like protein 15, Phytochrome interacting factor 3	TO:0000163 - auxin sensitivity, TO:0000397 - grain size, TO:0000590 - grain weight, TO:0002660 - cytokinin content, TO:0000567 - tiller angle, TO:0000396 - grain yield, TO:0000557 - secondary branch number
Zm00001eb328620	100272288	LOC100272288	1.14997	AT2G46950	Os07g0635500	cytochrome P450, family 709, subfamily B, polypeptide 2	CYP709B2	OsCYP709C5		Cytochrome P450 709C5
Zm00001eb413180	103641112	LOC103641112	1.13126	AT3G04150	Os12g0155000	RmlC-like cupins superfamily protein	NA	OsGLP12-4
Zm00001eb159340	100281232	WRKY64	1.12747	AT1G29860	Os01g0626400	WRKY DNA-binding protein 71	ATWRKY71	OsWRKY11, Dlf1, OsWRKY11.1, OsWRKY11.2	flowering time	Rice WRKY gene11, semidwarf and late flowering 1	TO:0002616 - flowering time, TO:0000188 - drought sensitivity, TO:0000615 - abscisic acid sensitivity, TO:0000166 - gibberellic acid sensitivity, TO:0000259 - heat tolerance, TO:0000207 - plant height, TO:0000401 - plant growth hormone sensitivity, TO:0006001 - salt tolerance, TO:0000303 - cold tolerance, TO:0000175 - bacterial blight disease resistance
Zm00001eb142640	100191151	LOC100191151	1.12153	AT5G61840	Os01g0926700	Exostosin family protein	GUT1	OsIRX10, IRX10		rice ortholog of Arabidopsis IRX10, IRREGULAR XYLEM10
Zm00001eb043760	107546748	LOC107546748	1.11366	AT5G53590	Os10g0510500	SAUR-like auxin-responsive protein family	NA	OsSAUR56	auxin signaling	Small auxin-up RNA 56
Zm00001eb261440	100273455	cl217_2b	1.09676	AT3G01760	Os08g0127100	Transmembrane amino acid transporter family protein	NA	OsHT, OsLHT1, LHT1		Histidine Transporter, lysine and histidine transporter 1, lysine-histidine-like transporter 1, Lysine/Histidine transporter 1	TO:0000447 - filled grain number, TO:0000455 - seed set percent, TO:0000371 - yield trait, TO:0000396 - grain yield, TO:0000207 - plant height, TO:0000576 - stem length, TO:0000346 - tiller number, TO:0000227 - root length
Zm00001eb371630	103637788	LOC103637788	1.0609	AT2G32990	Os06g0247900	glycosyl hydrolase 9B8	AtGH9B8	OsGH9B9		glycoside hydrolase OsGH9B9, glycoside hydrolase 9B9
Zm00001eb008810	103632803	LOC103632803	1.04193	AT5G26340	Os03g0218400	Major facilitator superfamily protein	ATSTP13	OsMST4		monosaccharide transporter 4
Zm00001eb383120	732743	spesyn	1.03264	AT5G53120	Os06g0528600	spermidine synthase 3	ATSPDS3	OsSPDS2, OsSPMS1, SPMS1		spermidine synthase 2, spermine synthase 1, spermidine/spermine synthase 1	TO:0006032 - panicle size, TO:0000430 - germination rate, TO:0000396 - grain yield, TO:0000397 - grain size, TO:0000734 - grain length, TO:0000592 - 1000-dehulled grain weight, TO:0000339 - stem thickness, TO:0006001 - salt tolerance, TO:0000449 - grain yield per plant, TO:0000207 - plant height
Zm00001eb434590	103642232	LOC103642232	1.01405	AT1G65610	Os04g0497200	Six-hairpin glycosidases superfamily protein	ATGH9A2	OsGLU3, OsGH9A2, GLU3, GH9A2		endo-1, 4-b-D-glucanase 3, glycoside hydrolase OsGH9A2, glycoside hydrolase 9A2	TO:0000015 - oxygen sensitivity
Zm00001eb323310	100272959	LOC100272959	1.00346	AT4G21230	Os07g0538400	cysteine-rich RLK (RECEPTOR-like protein kinase) 27	CRK27	OsRLCK235	RLCKs	Receptor-like Cytoplasmic Kinase 235	TO:0000074 - blast disease, TO:0000175 - bacterial blight disease resistance
Zm00001eb023870	100273299	THX4	-1.00072	AT2G44730	Os10g0564200	Alcohol dehydrogenase transcription factor Myb/SANT-like family protein	NA	OsMSL36		Myb/SANT-LIKE 36
Zm00001eb013520	541919	pdc3	-1.00172	AT5G54960	Os03g0293500	pyruvate decarboxylase-2	PDC2	pdc2*, pdc2		pyruvate decarboxylase-2, Pyruvate decarboxylase isozyme 2	TO:0000021 - copper sensitivity
Zm00001eb145570	103650913	LOC103650913	-1.01224	AT2G23140	Os01g0884400	RING/U-box superfamily protein with ARM repeat domain	NA	OsPUB16		plant U-box-containing protein 16, U-box protein 16
Zm00001eb229430	100282503	cl2158_1	-1.01372	AT4G17260	Os02g0105400	Lactate/malate dehydrogenase family protein	NA	LDH		lactate dehydrogenase
Zm00001eb291260	100191714	LOC100191714	-1.01469	AT1G78100	Os05g0490300	F-box family protein	NA	OsFbox265, Os_F0584		F-box protein 265
Zm00001eb173930	100501224	LOC100501224	-1.0285	AT3G49380	Os08g0115200	IQ-domain 15	iqd15	OsIQD14		IQ67-DOMAIN 14, IQD family protein 14	TO:0000592 - 1000-dehulled grain weight, TO:0002730 - grain shape, TO:0000397 - grain size, TO:0000734 - grain length, TO:0000396 - grain yield, TO:0000149 - seed width, TO:0000146 - seed length, TO:0000163 - auxin sensitivity, TO:0000621 - inflorescence development trait
Zm00001eb086280	100274230	si605052a04	-1.03413	AT4G31550	Os04g0287400	WRKY DNA-binding protein 11	ATWRKY11	OsWRKY51	bacterial disease resistance	Rice WRKY gene51	TO:0000175 - bacterial blight disease resistance
Zm00001eb204180	100272864	PYL9	-1.04448	AT1G01360	Os02g0255500	regulatory component of ABA receptor 1	PYL9	OsPYL/RCAR3, PYL3, OsPYL3, OsPYL10, PYL10, OsRCAR1, RCAR1		pyrabactin resistance-like 3, PYR1-like 10, pyrabactin resistance 1-like 10	TO:0000259 - heat tolerance, TO:0000615 - abscisic acid sensitivity, TO:0000303 - cold tolerance, TO:0000276 - drought tolerance, TO:0006001 - salt tolerance
Zm00001eb370960	100502167	WRKY111	-1.05565	AT3G58710	Os01g0750100	WRKY DNA-binding protein 69	ATWRKY69	OsWRKY13	bacterial disease resistance	Rice WRKY gene13	TO:0000175 - bacterial blight disease resistance, TO:0000020 - black streak dwarf virus resistance
Zm00001eb432020	103642120	LOC103642120	-1.08266	AT1G15290	Os04g0645100	Tetratricopeptide repeat (TPR)-like superfamily protein	NA	flo2, flo3(t), Osflo2, Osflo3(t), Osflo-2, flo-2		floury endosperm2, floury endosperm 2, floury endosperm-2, Floury 2	TO:0000162 - seed quality, TO:0000490 - protein composition related trait, TO:0000397 - grain size, TO:0000590 - grain weight, TO:0000105 - dull endosperm, TO:0002661 - seed maturation, TO:0000196 - amylose content, TO:0000266 - chalky endosperm, TO:0000104 - floury endosperm, TO:0000615 - abscisic acid sensitivity
Zm00001eb285830	100857041	PP2C19	-1.08377	AT3G16800	Os05g0358500	Protein phosphatase 2C family protein	NA	OsPP2C48, PP2C48, OsPP75		protein phosphatase 2C48, protein phosphatase 2C 48, protein phosphatase 75
Zm00001eb006680	103631833	LOC103631833	-1.08421	AT5G65320	Os03g0188400	basic helix-loop-helix (bHLH) DNA-binding superfamily protein	NA	OsbHLH044, bHLH044, OsbHLH96, bHLH96, bHLH096		basic helix-loop-helix protein 044	TO:0000424 - brown planthopper resistance
Zm00001eb355810	100285589	umc2378	-1.08566	AT1G07570	Os05g0110900	Protein kinase superfamily protein	APK1	OsRLCK176	bacterial disease resistance	receptor-like cytoplasmic kinase 176	TO:0000315 - bacterial disease resistance, TO:0000439 - fungal disease resistance, TO:0000074 - blast disease, TO:0002677 - brassinosteroid sensitivity, TO:0000206 - leaf angle, TO:0000175 - bacterial blight disease resistance
Zm00001eb211660	100274061	LOC100274061	-1.08705	AT1G07570	Os03g0821900	Protein kinase superfamily protein	APK1	OsRLCK118	bacterial disease resistance	Receptor-like Cytoplasmic Kinase 118	TO:0000074 - blast disease, TO:0000206 - leaf angle, TO:0002677 - brassinosteroid sensitivity, TO:0000445 - seed number, TO:0000175 - bacterial blight disease resistance, TO:0000050 - inflorescence branching
Zm00001eb238650	100276421	LOC100276421	-1.09248	AT1G78420	Os02g0244100	RING/U-box superfamily protein	NA	OsGW2		GRAIN WIDTH AND WEIGHT2, Grain width 2	TO:0000391 - seed size, TO:0000396 - grain yield, TO:0000402 - grain width, TO:0000397 - grain size, TO:0000590 - grain weight
Zm00001eb060170	100275635	pco118188	-1.10136	AT5G06560	Os03g0789200	Protein of unknown function, DUF593	NA			heavy meromyosin-like protein
Zm00001eb120370	100282757	LOC100282757	-1.10349	AT1G06390	Os01g0205700	GSK3/SHAGGY-like protein kinase 1	ATGSK1	GSK1, Os GSK1, OsGSK1, OsSK21/OsGSK1, OsSK21, SK21		GSK3/SHAGGY-Like Kinase 1, glycogen synthase kinase3-like gene 1, GSK3/SHAGGY-Like Kinase 21, GSK3-like Kinase 1	TO:0000207 - plant height, TO:0002677 - brassinosteroid sensitivity, TO:0006001 - salt tolerance, TO:0000276 - drought tolerance, TO:0000303 - cold tolerance
Zm00001eb040520	100217163	pco089222	-1.11933	AT5G27840	Os08g0455600	Calcineurin-like metallo-phosphoesterase superfamily protein	TOPP8	OsPP101		Protein phosphatase 101
Zm00001eb028030	100193705	LOC100193705	-1.1256	AT1G17290	Os10g0390500	alanine aminotransferas	AlaAT1	alaAT, ALT-1, OsAlaAT1, AlaAT1		alanine aminotransferase, Alanine transaminase 1, alanine-aminotransferase1	TO:0000696 - starch content, TO:0000196 - amylose content, TO:0000104 - floury endosperm
Zm00001eb251230	100502289	PLTZ1	-1.13488	AT4G17900	Os02g0692700	PLATZ transcription factor family protein	NA			PLATZ transcription factor
Zm00001eb058130	103644037	LOC103644037	-1.13739	AT4G33920	Os03g0761100	Protein phosphatase 2C family protein	NA	OsPP2C34, PP2C34, OsPP55, OsBIPP2C2, OsBIPP2C2a, OsBIPP2C2b, OsBIPP2C2c		protein phosphatase 2C34, protein phosphatase 2C 34, protein phosphatase 55, BTH-induced protein phosphatase 2C 2
Zm00001eb246150	100193059	AY111089	-1.14946	AT4G24740	Os12g0460800	FUS3-complementing gene 2	AFC2	OsAFC2, AFC2, OsDR11, DR11, OsDR11L, OsDR11S		serine/threonin-protein kinase AFC2	TO:0002668 - jasmonic acid content, TO:0000172 - jasmonic acid sensitivity, TO:0000175 - bacterial blight disease resistance, TO:0000043 - root anatomy and morphology trait, TO:0000276 - drought tolerance
Zm00001eb014850	100383702	LOC100383702	-1.17354	AT4G16250	Os03g0309200	phytochrome D	PHYD	phyB, PHYB1, OsPHYB, OsphyB, OsYHB, YHB, OsPHYB/OsYHB		PhytochromeB, Phytochrome B	TO:0000207 - plant height, TO:0002715 - chloroplast development trait, TO:0000346 - tiller number, TO:0000524 - submergence tolerance, TO:0002710 - root shape, TO:0002685 - crown root number, TO:0000586 - seminal root length, TO:0000135 - leaf length, TO:0000158 - red light sensitivity, TO:0000137 - days to heading, TO:0000495 - chlorophyll content, TO:0000298 - chlorophyll ratio, TO:0000326 - le…
Zm00001eb190530	100502487	LOC100502487	-1.18778	AT1G76390	Os03g0657100	ARM repeat superfamily protein	NA	OsPUB24, PUB24		plant U-box-containing protein 24, U-box protein 24	TO:0002677 - brassinosteroid sensitivity
Zm00001eb015710	100501706	LOC100501706	-1.18851	AT5G49720	Os03g0329500	glycosyl hydrolase 9A1	ATGH9A1	OsCel9D, Cel9D, OsGLU1, OsGH9A1, GH9A1		Endoglucanase 9, Endo-1, 4-beta glucanase 9, glycoside hydrolase OsGH9A1, glycoside hydrolase 9A1
Zm00001eb283810	100273048	LOC100273048	-1.20462	AT1G01360	Os05g0213500	regulatory component of ABA receptor 1	PYL9	OsPYL/RCAR5, PYL5, OsPYL5, OsPYL11, PYL11		pyrabactin resistance-like 5, PYR1-like 11, pyrabactin resistance 1-like 11	TO:0000207 - plant height, TO:0006001 - salt tolerance, TO:0000276 - drought tolerance, TO:0000615 - abscisic acid sensitivity
Zm00001eb041140	100284744	LOC100284744	-1.20763	AT4G30960	Os08g0441100	SOS3-interacting protein 3	ATCIPK6	OsCIPK06, CIPK6, OsCIPK6		CBL-interacting protein kinase 6	TO:0006001 - salt tolerance, TO:0000303 - cold tolerance, TO:0000276 - drought tolerance
Zm00001eb056510	542363	adh1	-1.21382	AT1G77120	Os11g0210300	alcohol dehydrogenase 1	ADH	Adh1, Adh1/2, adh1/adh2, OsADH1		Alcohol dehydrogenase1, Alcohol dehydrogenase 1, Alcohol dehydrogenase-1, reduced adh activity, Alcohol dehydrogenase I
Zm00001eb260730	100273449	TIDP9204	-1.22254	AT3G07370	Os08g0113300	carboxyl terminus of HSC70-interacting protein	ATCHIP	OsPUB68		plant U-box-containing protein 68, U-box protein 68
Zm00001eb182260	100502393	LOC100502393	-1.23615	AT1G59750	Os02g0557200	auxin response factor 1	ARF1	OsARF7		auxin response factor-7, auxin response factor 7	TO:0002693 - gravity response trait
Zm00001eb101840	103647538	LOC103647538	-1.29327	AT3G12630	Os09g0486500	A20/AN1-like zinc finger family protein	NA	Osi-SAP1, ISAP1, OsiSAP1, OSISAP1, OsSAP1	bacterial disease resistance	rice (indica) stress associated protein gene1, Zinc finger A20 and AN1 domain-containing stress-associated protein 1, Multiple stress-responsive zinc finger protein ISAP1, O. sativa subspecies indica stress-associated protein 1, stress-associated protein 1	TO:0000074 - blast disease, TO:0000303 - cold tolerance, TO:0006001 - salt tolerance, TO:0000276 - drought tolerance, TO:0002657 - oxidative stress, TO:0000112 - disease resistance, TO:0000179 - biotic stress trait, TO:0000172 - jasmonic acid sensitivity
Zm00001eb253150	100304421	COL5	-1.29663	AT3G07650	Os02g0724000	CONSTANS-like 9	COL9	OsN, OsBBX7, OsCCT08, OsDTH2, BBX7, CCT08, DTH2		CONSTANS-like gene N, B-box-containing protein 7, CCT domain-containing gene 8, CCT (CO, CO-LIKE and TOC1) domain protein 8, CCT domain protein 8	TO:0006001 - salt tolerance, TO:0000303 - cold tolerance, TO:0000276 - drought tolerance, TO:0000172 - jasmonic acid sensitivity, TO:0000166 - gibberellic acid sensitivity, TO:0000224 - iron sensitivity
Zm00001eb040280	100280446	CKX10	-1.2997	AT5G21482	Os08g0460600	cytokinin oxidase 7	ATCKX5	OsCKX11		cytokinin oxidase 11	TO:0000167 - cytokinin sensitivity
Zm00001eb144410	100272546	si946084h12	-1.32106	AT4G26850	Os01g0901300	mannose-1-phosphate guanylyltransferase (GDP)s;GDP-galactose:mannose-1-phosphate guanylyltransferases;GDP-galactose:glucose-1-phosphate guanylyltransferases;GDP-galactose:myoinositol-1-phosphate guanylyltransferases;glucose-1-phosphate guanylyltransferase	VTC2			a homologue of OsGGP
Zm00001eb312900	100284454	LOC100284454	-1.32334	AT2G25090	Os09g0418000	CBL-interacting protein kinase 16	CIPK16	OsCIPK16		CBL-interacting protein kinase 16	TO:0006001 - salt tolerance, TO:0000276 - drought tolerance
Zm00001eb046310	103643484	LOC103643484	-1.33601	AT5G43920	Os10g0465000	transducin family protein / WD-40 repeat family protein	NA	OsWD40-177
Zm00001eb003760	103631716	LOC103631716	-1.34364	AT3G44880	Os03g0146400	Pheophorbide a oxygenase family protein with Rieske [2Fe-2S] domain	ACD1	OsPAO, PAO, OsACD1		Pheophorbide a oxygenase, accelerated cell-death 1	TO:0000495 - chlorophyll content, TO:0000249 - leaf senescence
Zm00001eb179810	542583	gpn1	-1.34922	AT2G24270	Os08g0440800	aldehyde dehydrogenase 11A3	ALDH11A3	OsALDH11A3, GAPN		NADP-dependent glyceraldehyde-3-phosphate dehydrogenase, Aldehyde dehydrogenase 11A3	TO:0000432 - temperature response trait
Zm00001eb018900	100281350	LOL3	-1.35336	AT5G64240	Os03g0388900	metacaspase 3	AtMC3	OsMC1		Metacaspase 1	TO:0000074 - blast disease, TO:0000303 - cold tolerance, TO:0000615 - abscisic acid sensitivity, TO:0000276 - drought tolerance, TO:0006001 - salt tolerance, TO:0000259 - heat tolerance, TO:0000175 - bacterial blight disease resistance, TO:0000255 - sheath blight disease resistance, TO:0000172 - jasmonic acid sensitivity
Zm00001eb319530	100191342	SRS7	-1.3623	AT5G66350	Os09g0531600	Lateral root primordium (LRP) protein-related	SHI	OsSHI1		SHORT INTERNODES 1	TO:0006032 - panicle size, TO:0000346 - tiller number
Zm00001eb350630	100273694	AY111073	-1.36274	AT1G01360	Os05g0213500	regulatory component of ABA receptor 1	PYL9	OsPYL/RCAR5, PYL5, OsPYL5, OsPYL11, PYL11		pyrabactin resistance-like 5, PYR1-like 11, pyrabactin resistance 1-like 11	TO:0000207 - plant height, TO:0006001 - salt tolerance, TO:0000276 - drought tolerance, TO:0000615 - abscisic acid sensitivity
Zm00001eb046740	100192978	IDP190	-1.37127	AT5G22920	Os10g0456800	CHY-type/CTCHY-type/RING-type Zinc finger protein	NA	OsDCA1		DST Co-activator 1	TO:0006001 - salt tolerance, TO:0000605 - hydrogen peroxide content, TO:0000276 - drought tolerance
Zm00001eb048310	100284984	LOC100284984	-1.39211	AT3G29090	Os10g0407000	pectin methylesterase 31	ATPME31	OsPME29		pectin methylesterase 29
Zm00001eb311230	103632655	LOC103632655	-1.41981	AT4G39770	Os09g0369400	Haloacid dehalogenase-like hydrolase (HAD) superfamily protein	NA	OsTPP7		trehalose-6-phosphate phosphatase 7	TO:0000015 - oxygen sensitivity
Zm00001eb239920	103627089	LOC103627089	-1.42194	AT5G26010	Os02g0224100	Protein phosphatase 2C family protein	NA	OsPP2C12, PP2C12, OsPP21		protein phosphatase 2C12, protein phosphatase 2C 12, protein phosphatase 21
Zm00001eb378470	103638146	LOC103638146	-1.42216	AT4G24050	Os06g0129100	NAD(P)-binding Rossmann-fold superfamily protein	NA			Retinol dehydrogenase 14	TO:0000074 - blast disease
Zm00001eb288390	100274363	FBL2	-1.43535	AT1G77000	Os05g0425700	RNI-like superfamily protein	ATSKP2;2	OsFbox258, Os_F0658		F-box protein 258
Zm00001eb056320	100282141	LOC100282141	-1.43976	AT1G72280	Os03g0733800	endoplasmic reticulum oxidoreductins 1	AERO1	ERO1, Ero1		ER membrane-localized sulfhydryl oxidase Ero1, ER membrane-localized sulfhydryl oxidase 1
Zm00001eb001510	100501751	LOC100501751	-1.45129	AT2G02170	Os03g0120200	Remorin family protein	NA	OsREM6.2		Remorin 6.2, remorin group 6 member 2
Zm00001eb285760	100280468	cl15281_1(600)	-1.45209	AT3G16770	Os05g0361700	ethylene-responsive element binding protein	ATEBP	OsERF#061, OsERF061, OsERF61, AP2/EREBP#093, AP2/EREBP93		ethylene response factor 61, APETALA2/ethylene-responsive element binding protein 93	TO:0000620 - embryo development trait, TO:0000653 - seed development trait
Zm00001eb070510	103645931	LOC103645931	-1.45209	AT5G46330	Os04g0618700	Leucine-rich receptor-like protein kinase family protein	FLS2	Os-FLS2, FLS2, OsFLS2	bacterial disease resistance	flagellin sensitive2	TO:0000315 - bacterial disease resistance
Zm00001eb113780	100383277	LOC100383277	-1.45809	AT1G68050	Os11g0547000	flavin-binding, kelch repeat, f box 1	ADO3	OsFbox609, Os_F0370, OsFKF1		F-box protein 609, \FLAVIN-BINDING, KELCH REPEAT, F-BOX 1\""	TO:0002616 - flowering time
Zm00001eb179260	100280951	LOC100280951	-1.47021	AT1G68090	Os08g0425700	annexin 5	ANN5	OsANN7		Annexin 7
Zm00001eb217010	103625973	LOC103625973	-1.47081	AT5G49910	Os05g0303000	chloroplast heat shock protein 70-2	cpHsc70-2	OsHsp70CP1		heat shock protein 70 chloroplast protein 1
Zm00001eb109360	103647857	LOC103647857	-1.47211	AT4G33160	Os07g0617700	F-box family protein	NA	OsFbox397, Os_F0108		F-box protein 397
Zm00001eb265260	100383157	LOC100383157	-1.4847	AT4G23410	Os05g0126100	tetraspanin5	TET5	OsTET8		tetraspanin 8
Zm00001eb379120	542580	d3	-1.51893	AT2G32440	Os06g0110000	ent-kaurenoic acid hydroxylase 2	ATKAO2	OsKAO, kao, CYP88A5, OSKAO, Os KAO, RPE1		rice ent-kaurenoic acid oxidase, ent-kaurenoic acid oxidase, Putative cytochrome P450 DWARF3, reduced pollen elongation1	TO:0000599 - enzyme activity, TO:0000357 - growth and development trait, TO:0002675 - gibberellic acid content, TO:0000421 - pollen fertility, TO:0000420 - fertility related trait
Zm00001eb059230	542313	phi1	-1.51982	AT5G42740	Os03g0776000	Sugar isomerase (SIS) family protein	NA	Pgi1(Pgia), Pgia, Pgi_1, Pgi1, GPI-A, PHI-A, Pgi-a, PGI-a		Phosphoglucoisomerase1, Phosphoglucoisomerase 1, Phosphoglucoisomerase-1, Glucose-6-phosphate isomerase, cytosolic A, Phosphoglucose isomerase A, Phosphohexose isomerase A
Zm00001eb101120	103647502	LOC103647502	-1.52476	AT5G10440	Os09g0466100	cyclin d4;2	CYCD4;2	CycD2;1, CYCD2-1, Orysa;CycD2;1, OsCYCD2;1, Orysa;CycD4;1, CycD4;1, CYCD4-1, Orysa;CYCD4;1, cycD, OsCYCD4;1		Cyclin-D2-1, cyclinD2;1, Cyclin-D4-1, cyclinD4;1	TO:0000112 - disease resistance, TO:0000175 - bacterial blight disease resistance
Zm00001eb365340	103636385	LOC103636385	-1.56827	AT3G48430	Os01g0907400	relative of early flowering 6	REF6	JMJ705	bacterial disease resistance	Jumonji 705, Jumonji C Domain Protein JMJ705	TO:0000175 - bacterial blight disease resistance, TO:0000164 - stress trait, TO:0000172 - jasmonic acid sensitivity
Zm00001eb085680	100280507	LOC100280507	-1.56846	AT3G48530	Os04g0382300	SNF1-related protein kinase regulatory subunit gamma 1	KING1	OsCBSCBS3		cystathionine b-synthase domain containing protein OsCBSCBS3, CBS domain containing protein OsCBSCBS3
Zm00001eb309920	100279578	LOC100279578	-1.57003	AT1G07430	Os09g0325700	highly ABA-induced PP2C gene 2	HAI2	OsPP2C1, OsSIPP2C1, OsPP2C68, PP2C68, OsPP108	ABA signaling	protein phosphatase2C-1, protein phosphatase2C-l, salt-induced PP2C Protein 1, protein phosphatase 2C68, protein phosphatase 2C 68, protein phosphatase 108	TO:0000615 - abscisic acid sensitivity, TO:0006001 - salt tolerance, TO:0000276 - drought tolerance
Zm00001eb394390	100191939	LOC100191939	-1.6209	AT5G58670	Os05g0127200	phospholipase C1	ATPLC	OsPLC4		phospholipase C4, Phosphatidylinositol-hydrolyzing phospholipase C4	TO:0000095 - osmotic response sensitivity, TO:0000615 - abscisic acid sensitivity, TO:0000303 - cold tolerance, TO:0006001 - salt tolerance, TO:0000276 - drought tolerance
Zm00001eb290220	100502216	LOC100502216	-1.64095	AT5G58500	Os05g0472000	Protein of unknown function (DUF640)	LSH5	OsG1L8
Zm00001eb178890	103653427	LOC103653427	-1.70486	AT1G60140	Os08g0414700	trehalose phosphate synthase	ATTPS10	OsTPS7
Zm00001eb024960	103637728	LOC103637728	-1.73312	AT1G32170	Os10g0577500	xyloglucan endotransglucosylase/hydrolase 30	XTH30	OsXTH25		xyloglucan endotransglucosylase/hydrolase, xyloglucan endotransglucosylase 25
Zm00001eb316870	100272749	umc2567	-1.7512	AT5G42820	Os09g0491756	Zinc finger C-x8-C-x5-C-x3-H type family protein	ATU2AF35B	OsC3H60, U2AF35a, U2AF35A, OsU2AF35a		Splicing factor U2af small subunit A, U2 snRNP auxiliary factor small subunit A, U2 auxiliary factor 35 kDa subunit A, Zinc finger CCCH domain-containing protein 60, \U2 snRNP auxiliary factor, small subunit\", U2 small nuclear ribonucleoprotein auxiliary factor small subunit A, U2 Small Nuclear Ribonucleoprotein Auxiliary Factor U2AF Subunit 35a"
Zm00001eb103810	100383352	LOC100383352	-1.7588	AT4G38590	Os09g0539200	beta-galactosidase 14	BGAL14	OsBgal11, OsBGal11		Beta-galactosidase 12, Lactase 12
Zm00001eb075230	103646132	LOC103646132	-1.78746	AT3G61890	Os04g0541700	homeobox 12	ATHB-12	Oshox22, OsHox22		rice homeobox gene 22, Homeobox-leucine zipper protein HOX22, Homeodomain transcription factor HOX22, HD-ZIP protein HOX22
Zm00001eb402330	100191890	LOC100191890	-1.81541	AT4G16590	Os03g0169500	cellulose synthase-like A01	ATCSLA01	OsCslA4, OsCSLA4
Zm00001eb293700	103630641	LOC103630641	-1.8255	AT5G19730	Os05g0521600	Pectin lyase-like superfamily protein	NA	OsPME18		pectin methylesterase 18
Zm00001eb101170	100193377	umc2598	-1.85297	AT2G33750	Os09g0467400	purine permease 2	ATPUP2	OsPUP3		purine permease 3, PUP-type cytokinin transporter 3
Zm00001eb319390	100502166	HB128	-1.88944	AT3G61890	Os09g0528200	homeobox 12	ATHB-12	Oshox6, OsHox6		rice homeobox gene 6, Homeobox-leucine zipper protein HOX6, Homeodomain transcription factor HOX6, HD-ZIP protein HOX6
Zm00001eb002470	103631613	LOC103631613	-1.91111	AT3G07070	Os03g0130900	Protein kinase superfamily protein	NA	OsRLCK96	bacterial disease resistance	Receptor-like Cytoplasmic Kinase 96	TO:0000175 - bacterial blight disease resistance, TO:0000621 - inflorescence development trait
Zm00001eb047060	100217218	pco088212	-1.92469	AT3G47160	Os10g0445400	RING/U-box superfamily protein	NA	OsHCI1, E3UL		heat and cold induced 1, RING domain-containing E3 ubiquitin ligase	TO:0000259 - heat tolerance, TO:0000276 - drought tolerance
Zm00001eb239670	100383950	LOC100383950	-1.94294	AT2G26040	Os02g0226801	PYR1-like 2	PYL2	OsPYL/RCAR2, PYL2, OsPYL2, OsPYL3, PYL3		pyrabactin resistance-like 2, PYR1-like 3, pyrabactin resistance 1-like 3	TO:0000615 - abscisic acid sensitivity, TO:0000276 - drought tolerance
Zm00001eb426630	100217228	pco098379	-1.98892	AT4G17840	Os03g0100030	PF02517 - CAAX protease self-immunity (Abi) (1 of 8)	NA	OsG			TO:0000253 - seed dormancy
Zm00001eb033950	100384791	IDP1951	-2.08832	AT3G13340	Os08g0497600	Transducin/WD40 repeat-like superfamily protein	NA	SRWD1, OsWD40-162		salt responsive WD40 protein 1
Zm00001eb055950	100217270	LOC100217270	-2.09202	AT5G65800	Os03g0727600	ACC synthase 5	ACS5	ACC1*, OsACS1, Os-ACS1, ACC1	growth	1-AMINOCYCLOPROPANE-1-CARBOXYLATE SYNTHASE 1, ACC synthase 1, 1-aminocyclopropane-1-carboxylate synthase 1, ACC synthase-1, S-adenosyl-L-methionine methylthioadenosine-lyase 1, 1-aminocyclopropane-1-carboxylic acid synthase 1	TO:0000034 - chromium sensitivity, TO:0000481 - alkali sensitivity, TO:0000163 - auxin sensitivity, TO:0000227 - root length, TO:0001012 - lateral root length, TO:0000576 - stem length
Zm00001eb142430	100383845	LOC100383845	-2.1627	AT3G26700	Os01g0929200	Protein kinase superfamily protein	NA	OsRLCK53	bacterial disease resistance	Receptor-like Cytoplasmic Kinase 53	TO:0000175 - bacterial blight disease resistance, TO:0000276 - drought tolerance
Zm00001eb000440	107546763	LOC107546763	-2.17508	AT2G45180	Os03g0103300	Bifunctional inhibitor/lipid-transfer protein/seed storage 2S albumin superfamily protein	NA	qLTG-3-1(t), qLTG3-1, OsHyPRP05, OsHyPRP5, HyP/GRP05, HyP/GRP5		low-temperature germianability (QTL)-3-1(t), hybrid proline- or glycine-rich protein 5, Hybrid Proline-Rich Protein 5	TO:0000303 - cold tolerance, TO:0000253 - seed dormancy, TO:0000615 - abscisic acid sensitivity, TO:0006001 - salt tolerance, TO:0000259 - heat tolerance, TO:0000074 - blast disease
Zm00001eb353600	100280678	LOC100280678	-2.19531	AT5G07500	Os05g0525900	Zinc finger C-x8-C-x5-C-x3-H type family protein	PEI1	OsC3H37, OsTZF7, OsCCCH-Zn-1		Zinc finger CCCH domain-containing protein 37, Tandem zinc finger protein 7
Zm00001eb121020	100286264	LOC100286264	-2.29551	AT4G33040	Os01g0194600	Thioredoxin superfamily protein	NA	OsGRX2		glutaredoxin 2
Zm00001eb351790	100279044	LOC100279044	-2.44937	AT5G01300	Os05g0468800	PEBP (phosphatidylethanolamine-binding protein) family protein	NA
Zm00001eb326990	100037799	Bk2L6	-2.46593	AT3G02210	Os07g0604300	COBRA-like protein 1 precursor	COBL1	OsBC1L6, OsPCS8, PCS8		BRITTLE CULM1-like 6, Brittle Culm 1-like 6, Phytochelatin synthase 8	TO:0000351 - zinc sensitivity
Zm00001eb314330	100272958	LOC100272958	-2.50577	AT1G55230	Os09g0444900	Family of unknown function (DUF716)	NA				TO:0000276 - drought tolerance
Zm00001eb032520	100273384	LOC100273384	-2.547	AT4G11650	Os12g0628600	osmotin 34	ATOSM34	OsPR5, Pir2, PR-5, PR5-1	bacterial disease resistance	pathogenesis-related gene 5, Pathogenesis-related protein class 5 gene	TO:0000175 - bacterial blight disease resistance
Zm00001eb120710	542037	LOC542037	-2.55391	AT4G18960	Os01g0201700	K-box region and MADS-box transcription factor family protein	AG	MADS3, OsMADS3, OsMADS3(t), RMADS222, RAG1		MADS box gene3, MADS-box transcription factor 3, Protein AGAMOUS-like	TO:0000215 - stamen anatomy and morphology trait, TO:0006009 - lodicule anatomy and morphology trait, TO:0006023 - lodicule development trait, TO:0000622 - flower development trait, TO:0000621 - inflorescence development trait
Zm00001eb258360	606483	PPCK1	-2.67886	AT1G08650	Os02g0807000	phosphoenolpyruvate carboxylase kinase 1	ATPPCK1	OsPPCK1		phosphoenol pyruvate carboxylase kinase1, phosphoenolpyruvate carboxylase kinase 1	TO:0000276 - drought tolerance
Zm00001eb417150	100279270	TIDP2980	-2.70106	AT2G47240	Os05g0132100	AMP-dependent synthetase and ligase family protein	CER8	OsLACS1		long-chain acyl-CoA synthetase 1
Zm00001eb351810	542376	pdc1	-2.72728	AT5G54960	Os05g0469600	pyruvate decarboxylase-2	PDC2	pdc1*, pdc1, pdc4, pdc 1, PDC 1, RRJ2		pyruvate decarboxylase-1, Pyruvate decarboxylase isozyme 1, Pyruvate Decarboxylase 1	TO:0000621 - inflorescence development trait
Zm00001eb145600	107521947	LOC107521947	-2.89881	AT1G44090	Os01g0883800	gibberellin 20-oxidase 5	ATGA20OX5	sd1, sd1 (d47, sd1-d, sd1-1), d49(sd1-r), d47, C20OX2, OsGA20ox-2, OsGA20ox2, GA20ox-2, GA20OX2, GA20ox2, sd-1, SD1-ja, SD1-in, sd1-2, Sd-1, GA20, 20ox2, Os20ox2	GA signaling	dee-geo-woo-gen dwarf(sd1-d), green revolution gene, semidwarf-1, GA C20oxidase2, semidwarf-1, reimei dwarf(sd1-r), Calrose76(sd1-3), Jikkoku(sd1-2). rice GA 20-oxidase2, GA 20-oxidase 2, Gibberellin 20 oxidase 2, Gibberellin C-20 oxidase 2, GA 20-oxidase 2, Protein semidwarf-1, semi-dwarf1	TO:0000599 - enzyme activity, TO:0000207 - plant height, TO:0000357 - growth and development trait, TO:0000401 - plant growth hormone sensitivity, TO:0000576 - stem length, TO:0000524 - submergence tolerance, TO:0002675 - gibberellic acid content
Zm00001eb433540	542321	lhcb6	-2.96886	AT1G15820	Os04g0457000	light harvesting complex photosystem II subunit 6	CP24	CP24, Lhcb6, OsCP24, OsLhcb6	light	light-harvesting protein CP24, PSII CP24, light-harvesting complex subunit b6	TO:0000158 - red light sensitivity, TO:0000159 - blue light sensitivity
Zm00001eb204410	100273026	LOC100273026	-3.02825	AT4G03280	Os07g0556200	photosynthetic electron transfer C	PETC	PetC		Rieske Fe-S precursor protein	TO:0000031 - silicon sensitivity
Zm00001eb388280	103638799	LOC103638799	-3.33695	AT1G49190	Os05g0395600	response regulator 19	ARR19	OsRR27, Rra16, OsPRR5, OsRRA16		A-type RR 16, response regulator 27
Zm00001eb066480	100273752	LOC100273752	-3.43151	AT1G15820	Os04g0457000	light harvesting complex photosystem II subunit 6	CP24	CP24, Lhcb6, OsCP24, OsLhcb6	light	light-harvesting protein CP24, PSII CP24, light-harvesting complex subunit b6	TO:0000158 - red light sensitivity, TO:0000159 - blue light sensitivity
Zm00001eb293510	100280983	LOC100280983	-3.44157	AT5G07500	Os05g0525900	Zinc finger C-x8-C-x5-C-x3-H type family protein	PEI1	OsC3H37, OsTZF7, OsCCCH-Zn-1		Zinc finger CCCH domain-containing protein 37, Tandem zinc finger protein 7
Zm00001eb277050	103629798	LOC103629798	-3.57152	AT1G15670	Os06g0594400	Galactose oxidase/kelch repeat superfamily protein	NA	OsKMD2, OsFbox314, Os_F0507	cytokinin signaling	KISS ME DEADLY2, KISS ME DEADLY 2, F-box protein 314	TO:0000167 - cytokinin sensitivity
Zm00001eb048790	103643604	LOC103643604	-3.81115	AT2G25680	Os08g0101500	molybdate transporter 1	MOT1	OsSultr5;2, OsSul5;2, Os-MOT1;1, OsMOT1;1, MOT1;1, qGMo8		sulphate transporter 5;2, MOLYBDATE TRANSPORTER1;1, MOLYBDATE TRANSPORTER 1;1	TO:0000303 - cold tolerance, TO:0000025 - molybdenum sensitivity, TO:0000034 - chromium sensitivity, TO:0000653 - seed development trait, TO:0000276 - drought tolerance, TO:0006001 - salt tolerance
Zm00001eb154780	100384481	LOC100384481	-7.14436	AT1G16670	Os12g0611100	Protein kinase superfamily protein	NA	OsRLCK373		Receptor-like Cytoplasmic Kinase 373	TO:0006001 - salt tolerance, TO:0000653 - seed development trait, TO:0000621 - inflorescence development trait, TO:0000276 - drought tolerance, TO:0000074 - blast disease

## Sheet: 3 hpi
name	maize	gene_symbol	diffexp_log2fc_DTE_3h.vs.TE_3h	Arabidopsis.thaliana.gene.stable.ID	Oryza.sativa.Japonica.Group.gene.stable.ID	annotation_ATR	gene_names_ATR	Gene.symbol.synonym.s._rice	classification	Gene.name.synonym.s._rice	Trait.Ontology_rice
Zm00001eb150400	100281583	LOC100281583	9.66756	AT2G26850	Os01g0806200	F-box family protein	NA	OsFbox045, OsFbox45, Os_F0307		F-box protein 45
Zm00001eb137340	103650569	LOC103650569	5.31907	AT4G27970	Os07g0181100	SLAC1 homologue 2	SLAH2	SLAC		SLOW ANION CHANNEL
Zm00001eb426930	100526748	ysl11	4.99698	AT1G65730	Os04g0524900	YELLOW STRIPE like 7	YSL7	OsYSL11		rice YSL (yellow stripe-like) gene 11, Probable metal-nicotianamine transporter YSL11, Protein YELLOW STRIPE LIKE 11, yellow stripe 1-like transporter 11
Zm00001eb312010	103632716	LOC103632716	4.08545	AT2G01770	Os09g0396900	vacuolar iron transporter 1	ATVIT1	OsVIT2, OsVIT1, VIT2, VIT1		Vacuolar Iron Transporter 2, vacuolar Fe and Mn transporter 1
Zm00001eb004260	103631735	LOC103631735	3.60337	AT1G20190	Os03g0155300	expansin 11	ATEXP11	OsEXPA12, OsEXP12, osaEXPa1.15		expansin A12, Rice expansin-12, Expansin-A12, Alpha-expansin-12
Zm00001eb099940	100383399	LOC100383399	3.42705	AT4G33230	Os09g0433700	Plant invertase/pectin methylesterase inhibitor superfamily	NA	OsPME27		pectin methylesterase 27
Zm00001eb152810	100272663	LOC100272663	3.14394	AT2G42380	Os01g0756200	Basic-leucine zipper (bZIP) transcription factor family protein	ATBZIP34	OsbZIP06, OsbZIP6	TFs	b-ZIP transcription factor 06
Zm00001eb163460	100280090	LOC100280090	3.09447	AT5G13740	Os12g0133000	zinc induced facilitator 1	ZIF1	OsZIFL11		zinc-induced facilitator-like 11
Zm00001eb048540	100126887	cyp8	2.87873	AT5G09970	Os10g0403000	cytochrome P450, family 78, subfamily A, polypeptide 7	CYP78A7	pla1, OsPLA1, plt1, CYP78A11		plastochron1, plastochron 1, plastochron-1, Cytochrome P450 78A11, Protein PLASTOCHRON1	TO:0000166 - gibberellic acid sensitivity, TO:0000621 - inflorescence development trait, TO:0000369 - vegetative growth time, TO:0000730 - mitotic cell cycle trait, TO:0000659 - phyllochron, TO:0002638 - shoot meristem development, TO:0000050 - inflorescence branching
Zm00001eb122890	103649694	LOC103649694	2.51822	AT3G01550	Os01g0172100	phosphoenolpyruvate (pep)/phosphate translocator 2	ATPPT2	OsPPT3
Zm00001eb223910	107648857	LOC107648857	2.50394	AT5G60660	Os03g0861300	plasma membrane intrinsic protein 2;4	PIP2;4	OsPIP2;8, PIP2.8, PIP2-8, OsPIP2-7		Probable aquaporin PIP2.8, Probable aquaporin PIP2-8, Plasma membrane intrinsic protein 2-8	TO:0000095 - osmotic response sensitivity, TO:0000276 - drought tolerance, TO:0006001 - salt tolerance, TO:0000615 - abscisic acid sensitivity
Zm00001eb121190	107521951	LOC107521951	2.46925	AT4G26200	Os05g0319200	1-amino-cyclopropane-1-carboxylate synthase 7	ACS7	OsACS4, OS-ACS4		ACC synthase 4, 1-aminocyclopropane-1-carboxylic acid synthase 4
Zm00001eb144960	541856	lox1	2.28158	AT1G55020	Os03g0738600	lipoxygenase 1	ATLOX1	OsLOX-L2, LOX1.1, LOX L-2, LOX-2	ROS	Lipoxygenase 2, Lipoxygenase L-2
Zm00001eb101560	103647524	LOC103647524	2.23881	AT4G26540	Os09g0479200	Leucine-rich repeat receptor-like protein kinase family protein	NA	OsRLCK275	RLCKs	Receptor-like Cytoplasmic Kinase 275
Zm00001eb249600	100273516	gpm282	2.20721	AT3G60570	Os02g0658800	expansin B5	ATEXPB5	OsEXPB11, osaEXPb1.20		Expansin-B11, Beta-expansin-11
Zm00001eb194770	100381405	LOC100381405	2.10535	AT3G01330	Os02g0739700	DP-E2F-like protein 3	DEL3	Orysa;DEL1		DP-LIKE 1
Zm00001eb000370	103630483	LOC103630483	2.06622	AT3G60570	Os03g0102500	expansin B5	ATEXPB5
Zm00001eb422440	100192589	H3C4	2.03732	AT5G65350	Os06g0160001	histone 3 11	HTR11	H3		H3 histone, Histone 3
Zm00001eb433330	100283826	LOC100283826	1.86321	AT5G43060	Os04g0670200	Granulin repeat cysteine protease family protein	NA			oryzain beta
Zm00001eb036580	103642932	LOC103642932	1.86163	AT1G27920	Os08g0531100	microtubule-associated protein 65-8	MAP65-8			MAP65/ASE family protein
Zm00001eb048860	103643608	LOC103643608	1.86045	AT1G61890	Os03g0572900	MATE efflux family protein	NA	PEZ2		phenolics efflux zero 2, phenolics efflux transporter 2
Zm00001eb251530	103627587	LOC103627587	1.77933	AT1G30650	Os02g0698800	WRKY DNA-binding protein 14	AR411	OsWRKY66	WRKY	Rice WRKY gene66	TO:0000175 - bacterial blight disease resistance, TO:0000259 - heat tolerance
Zm00001eb106470	103647736	LOC103647736	1.77626	AT5G54650	Os07g0545500	formin homology5	ATFH5	OsSTA198, STA198, OsFH11, FH11	Spikelet, flower	formin homology 11, forming family protein 11, FH2 protein 11, FH2 domain protein 11
Zm00001eb406590	103640748	LOC103640748	1.7375	AT1G74380	Os12g0149300	xyloglucan xylosyltransferase 5	XXT5	OsGT3		glycosyltransferase 3
Zm00001eb122240	103649667	LOC103649667	1.70105	AT4G14090	Os01g0179600	UDP-Glycosyltransferase superfamily protein	NA	OsUGT75K1		UDP-glucose-dependent glycosyltransferase 75K1, chloroplastic crocetin glucosyltransferase
Zm00001eb117610	103648322	LOC103648322	1.54929	AT4G20940	Os07g0145400	Leucine-rich receptor-like protein kinase family protein	NA	OsGHR1		Guard cell Hydrogen peroxide-Resistant1
Zm00001eb195200	100192105	LOC100192105	1.52646	AT5G58390	Os12g0112000	Peroxidase superfamily protein	NA	Pox, prx135, OsPRX1	ROS	Peroxidase, class III peroxidase 135
Zm00001eb078510	100192012	TIDP3470	1.50833	AT3G27060	Os06g0257450	Ferritin/ribonucleotide reductase-like family protein	ATTSO2	st1(ws1), ws1, st1, RNRS1, OsRNRS1, rnrs1, RNRS, SDL/RNRS1, SDL		stripe1, stripe 1, stripe-1, ribonucleotide reductase small subunit 1, stripe and drooping leaf	TO:0000069 - variegated leaf, TO:0000495 - chlorophyll content, TO:0000432 - temperature response trait, TO:0000326 - leaf color
Zm00001eb422440	103646477	LOC103646477	1.50722	AT5G65350	Os06g0160001	histone 3 11	HTR11	H3		H3 histone, Histone 3
Zm00001eb254390	103627718	LOC103627718	1.47645	AT1G73590	Os02g0743400	Auxin efflux carrier family protein	ATPIN1	PIN1A, OsPIN1A, OsPIN1a, REH1, OsPIN1, OsPIN1b, REH1/OsPIN1	auxin signaling	PIN PROTEIN 1A, the rice homolog of A. thaliana EIR1, PIN-FORMED 1b, PIN-formed 1, rice ethylene insensitive root 1	TO:0000017 - anatomy and morphology related trait, TO:0002672 - auxin content, TO:0000163 - auxin sensitivity, TO:0002639 - shoot branching, TO:0000257 - root branching, TO:0000656 - root development trait, TO:0000167 - cytokinin sensitivity, TO:0002652 - root phototropism, TO:0000329 - tillering ability, TO:0000401 - plant growth hormone sensitivity, TO:0000011 - nitrogen sensitivity, TO:0006022…
Zm00001eb098340	100279397	LOC100279397	1.42891	AT3G61580	Os09g0338500	Fatty acid/sphingolipid desaturase	NA	OsSLD	sphingolipid	sphingolipid LCB delta8 desaturase, sphingolipid long-chain base delta8 desaturase
Zm00001eb057230	100191390	exg1	1.40672	AT5G20940	Os03g0749300	Glycosyl hydrolase family protein	NA	OsBGLU1		periplasmic beta-glucosidase 1
Zm00001eb385870	542018	fae1	1.4039	AT2G26640	Os06g0598800	3-ketoacyl-CoA synthase 11	KCS11	WSL1, FAE', OsFAE1', OsCER6	Fatty acid	Wax Crystal-Sparse Leaf1, FATTY ACID ELONGATION1', fatty acid elongase 1', ECERIFERUM 6	TO:0000709 - leaf gloss
Zm00001eb390970	100279303	LOC100279303	1.391	AT3G60320	Os10g0562700	Protein of unknown function (DUF630 and DUF632)	NA			rolled and erect leaf 2	TO:0001018 - transpiration rate, TO:0000326 - leaf color, TO:0000295 - chlorophyll-b content, TO:0000346 - tiller number, TO:0002730 - grain shape, TO:0000447 - filled grain number, TO:0001027 - net photosynthetic rate, TO:0000293 - chlorophyll-a content, TO:0000206 - leaf angle, TO:0002688 - leaf lamina joint bending
Zm00001eb313530	100194288	LOC100194288	1.36698	AT4G31590	Os09g0428000	Cellulose-synthase-like C5	ATCSLC05	OsCslC2, OsCSLC2	Cellulose
Zm00001eb257590	100274751	LOC100274751	1.35804	AT4G30440	Os02g0791500	UDP-D-glucuronate 4-epimerase 1	GAE1	OsUGlcAE3		UDP-glucuronic acid 4-epimerase 3
Zm00001eb144930	100037802	lox2	1.35213	AT1G55020	Os03g0738600	lipoxygenase 1	ATLOX1	OsLOX-L2, LOX1.1, LOX L-2, LOX-2		Lipoxygenase 2, Lipoxygenase L-2
Zm00001eb371030	100193595	LOC100193595	1.30703	AT1G53140	Os01g0748000	Dynamin related protein 5A	DRP5A			ATP- binding protein
Zm00001eb370320	103636619	LOC103636619	1.30322	AT3G29200	Os01g0764400	chorismate mutase 1	ATCM1	CM, OsCM		chorismate mutase	TO:0000160 - UV light sensitivity
Zm00001eb327000	100037800	Bk2L7	1.29351	AT5G15630	Os07g0604400	COBRA-like extracellular glycosyl-phosphatidyl inositol-anchored protein family	COBL4	OsBC1L7, OsPCS6, PCS6		BRITTLE CULM1-like 7, Phytochelatin synthase 6
Zm00001eb308160	103632410	LOC103632410	1.28945	AT3G42660	Os09g0241100	transducin family protein / WD-40 repeat family protein	NA	OsWD40-166
Zm00001eb152700	100273044	gpm464	1.28544	AT2G34560	Os01g0757400	P-loop containing nucleoside triphosphate hydrolases superfamily protein	NA	SKD1		SKD1 protein, Vacuolar sorting protein4b, Vacuolar sorting protein 4b
Zm00001eb074870	103646119	LOC103646119	1.27461	AT5G07620	Os04g0548400	Protein kinase superfamily protein	NA	OsRLCK156	RLCKs	Receptor-like Cytoplasmic Kinase 156	TO:0000621 - inflorescence development trait
Zm00001eb325630	100272993	LOC100272993	1.26685	AT2G18550	Os07g0581700	homeobox protein 21	ATHB21	Oshox14, OsHox14		rice homeobox gene 14, Homeobox-leucine zipper protein HOX14, Homeodomain transcription factor HOX14, HD-ZIP protein HOX14
Zm00001eb342080	100383139	LOC100383139	1.26361	AT2G16440	Os01g0544450	Minichromosome maintenance (MCM2/3/5) family protein	MCM4	OsMCM4
Zm00001eb350340	542206	MCM6	1.24458	AT5G44635	Os05g0235800	minichromosome maintenance (MCM2/3/5) family protein	MCM6	OsMCM6
Zm00001eb199660	100281475	LOC100281475	1.22563	AT2G04780	Os08g0502400	FASCICLIN-like arabinoogalactan 7	FLA7	OsFLA5	AGPs	fasciclin-like AGP 5, fasciclin-like arabinogalactan protein 5	TO:0006001 - salt tolerance, TO:0000276 - drought tolerance
Zm00001eb144630	100280071	TIDP3759	1.22159	AT5G36890	Os01g0897600	beta glucosidase 42	BGLU42	Os1bglu4, Os1Bglu4, Os1BGlu4		beta-glucosidase 4
Zm00001eb054230	100274288	cl1052_1	1.216	AT3G18080	Os03g0703000	B-S glucosidase 44	BGLU44	Os3bglu7, Os3BGlu7, 3BGLU7, BGlu7, BGlu1, bglu1		beta-glucosidase 7	TO:0000058 - herbicide sensitivity
Zm00001eb310330	100191970	TIDP3195	1.20202	AT3G61580	Os09g0338500	Fatty acid/sphingolipid desaturase	NA	OsSLD	Fatty acid	sphingolipid LCB delta8 desaturase, sphingolipid long-chain base delta8 desaturase
Zm00001eb393670	100382583	si486022a09	1.18324	AT4G11880	Os10g0536100	AGAMOUS-like 14	AGL14	OsMADS56, FDRMADS8, RMADS214		MADS box gene56, MADS-box transcription factor 56	TO:0000621 - inflorescence development trait, TO:0002616 - flowering time
Zm00001eb431930	103642112	LOC103642112	1.1784	AT3G28860	Os04g0642000	ATP binding cassette subfamily B19	ABCB19	OsABCB16, ABCB16, OsPGP16, OsMDR12		ABC transporter superfamily ABCB subgroup member 16, P-Glycoprotein 16, multidrug resistance 12	TO:0000163 - auxin sensitivity, TO:0000276 - drought tolerance, TO:0006001 - salt tolerance, TO:0000615 - abscisic acid sensitivity
Zm00001eb194640	103654258	LOC103654258	1.16922	AT1G73590	Os02g0743400	Auxin efflux carrier family protein	ATPIN1	PIN1A, OsPIN1A, OsPIN1a, REH1, OsPIN1, OsPIN1b, REH1/OsPIN1	auxin signaling	PIN PROTEIN 1A, the rice homolog of A. thaliana EIR1, PIN-FORMED 1b, PIN-formed 1, rice ethylene insensitive root 1	TO:0000017 - anatomy and morphology related trait, TO:0002672 - auxin content, TO:0000163 - auxin sensitivity, TO:0002639 - shoot branching, TO:0000257 - root branching, TO:0000656 - root development trait, TO:0000167 - cytokinin sensitivity, TO:0002652 - root phototropism, TO:0000329 - tillering ability, TO:0000401 - plant growth hormone sensitivity, TO:0000011 - nitrogen sensitivity, TO:0006022…
Zm00001eb358290	541778	LOC541778	1.1554	AT1G15660	Os01g0617700	centromere protein C	CENP-C	CENP-C		centromere protein C
Zm00001eb282320	100280729	rfz1	1.15201	AT4G12730	Os08g0321000	FASCICLIN-like arabinogalactan 2	FLA2	OsFLA3	AGPs	fasciclin-like AGP 3, fasciclin-like arabinogalactan protein 3
Zm00001eb365740	100101530	LOC100101530	1.14698	AT1G65470	Os01g0896300	chromatin assembly factor-1 (FASCIATA1) (FAS1)	FAS1	FSM, FAS1		FLATENNED SHOOT MERISTEM, FASCIATA1, CAF-1 p150 subunit, p150 subunit of chromatin assembly factor-1
Zm00001eb222300	542736	CPNA	1.14467	AT3G23990	Os10g0462900	heat shock protein 60	HSP60			58K antigen, HypB protein
Zm00001eb096980	103647314	LOC103647314	1.13559	AT1G09210	Os07g0246200	calreticulin 1b	AtCRT1b	CRO1, CRT	calreticulin	calreticulin 1, calreticulin	TO:0000160 - UV light sensitivity, TO:0000432 - temperature response trait
Zm00001eb060130	100191430	LOC100191430	1.12444	AT5G05650	Os03g0788700	PTHR32499:SF3 - FASCICLIN-LIKE ARABINOGALACTAN PROTEIN 15-RELATED (1 of 5)	NA	OsFLA17	AGPs	fasciclin-like AGP 17, fasciclin-like arabinogalactan protein 17	TO:0000621 - inflorescence development trait
Zm00001eb049310	100283131	LOC100283131	1.12237	AT3G02870	Os03g0587000	Inositol monophosphatase family protein	VTC4	OsIMP-1, IMP-1, OsIMP, IMP		inositol monophosphatase 1, L-myo-inositol monophosphatase, IMPase	TO:0000605 - hydrogen peroxide content, TO:0000615 - abscisic acid sensitivity, TO:0000303 - cold tolerance, TO:0000495 - chlorophyll content
Zm00001eb424890	100193425	LOC100193425	1.11069	AT4G24710	Os04g0479000	P-loop containing nucleoside triphosphate hydrolases superfamily protein	NA	OsCRC1		CENTRAL REGION COMPONENT 1
Zm00001eb139060	100381559	LOC100381559	1.08946	AT1G35670	Os12g0169800	calcium-dependent protein kinase 2	ATCDPK2	OsCDPK28, OsCPK28	CDPK	calcium-dependent protein kinase
Zm00001eb023690	100381684	LOC100381684	1.07339	AT3G60320	Os10g0562700	Protein of unknown function (DUF630 and DUF632)	NA			rolled and erect leaf 2	TO:0001018 - transpiration rate, TO:0000326 - leaf color, TO:0000295 - chlorophyll-b content, TO:0000346 - tiller number, TO:0002730 - grain shape, TO:0000447 - filled grain number, TO:0001027 - net photosynthetic rate, TO:0000293 - chlorophyll-a content, TO:0000206 - leaf angle, TO:0002688 - leaf lamina joint bending
Zm00001eb063040	100286004	pco078735	1.0666	AT3G54030	Os03g0825300	Protein kinase protein with tetratricopeptide repeat domain	NA	OsRLCK119, OsBSK4, BSK4	RLCKs	Receptor-like Cytoplasmic Kinase 119, BR-signaling kinase 4, brassinosteroid-signaling kinase 4, brassinosteroid-SIGNALING KINASE 4
Zm00001eb242820	542314	incw1	1.05686	AT3G52600	Os02g0534400	cell wall invertase 2	AtcwINV2	OSCIN1, OsCIN1		cell-wall invertase 1, Cell wall-bound invertase 1	TO:0000074 - blast disease, TO:0006001 - salt tolerance
Zm00001eb315340	100283312	LOC100283312	1.00719	AT4G33580	Os09g0464000	beta carbonic anhydrase 5	ATBCA5	OsbetaCA2, betaCA2		beta-carbonic anhydrase 2
Zm00001eb422440	103638044	LOC103638044	1.00127	AT5G65350	Os06g0160001	histone 3 11	HTR11	H3		H3 histone, Histone 3
Zm00001eb433420	100384522	TIDP3366	-1.0012	AT1G65840	Os04g0671300	polyamine oxidase 4	ATPAO4	OsPAO5, OsAO2, AO2		Polyamine oxidase 5, Amine oxidase 2	TO:0010001 - percent germination, TO:0000605 - hydrogen peroxide content, TO:0006001 - salt tolerance
Zm00001eb382320	103638392	LOC103638392	-1.00395	AT4G36550	Os06g0480000	ARM repeat superfamily protein	NA	OsPUB74		plant U-box-containing protein 74, U-box protein 74
Zm00001eb294370	100285847	umc1296	-1.00825	AT5G11950	Os05g0541200	Putative lysine decarboxylase family protein	NA	LOGL7		LOG LIKE phosphoribohydrolase 7, LOG LIKE 7
Zm00001eb056510	542363	adh1	-1.01074	AT1G77120	Os11g0210300	alcohol dehydrogenase 1	ADH	Adh1, Adh1/2, adh1/adh2, OsADH1		Alcohol dehydrogenase1, Alcohol dehydrogenase 1, Alcohol dehydrogenase-1, reduced adh activity, Alcohol dehydrogenase I
Zm00001eb016120	100304391	pco079591	-1.03302	AT2G40520	Os03g0336700	Nucleotidyltransferase family protein	NA	OsNTP6		nucleotidyl transferase protein 6	TO:0000259 - heat tolerance, TO:0000303 - cold tolerance, TO:0000615 - abscisic acid sensitivity, TO:0006001 - salt tolerance
Zm00001eb251230	100502289	PLTZ1	-1.0338	AT4G17900	Os02g0692700	PLATZ transcription factor family protein	NA		TFs	PLATZ transcription factor
Zm00001eb217010	103625973	LOC103625973	-1.03883	AT5G49910	Os05g0303000	chloroplast heat shock protein 70-2	cpHsc70-2	OsHsp70CP1		heat shock protein 70 chloroplast protein 1
Zm00001eb258520	103627883	LOC103627883	-1.0587	AT3G23430	Os02g0809800	phosphate 1	ATPHO1	OsPHO1;2		PHOSPHATE1;2
Zm00001eb158420	103651425	LOC103651425	-1.0622	AT2G26650	Os01g0648000	K+ transporter 1	AKT1	OsAKT1, Os-AKT1		salt-sensitive K1 uptake channel OsAKT1, K+ channel alpha subunit	TO:0000514 - potassium uptake, TO:0000276 - drought tolerance, TO:0000095 - osmotic response sensitivity, TO:0000609 - potassium content, TO:0000513 - potassium concentration, TO:0000526 - sodium concentration, TO:0000608 - sodium content, TO:0006001 - salt tolerance, TO:0000527 - sodium uptake
Zm00001eb271860	100136882	y1	-1.06408	AT5G17230	Os06g0729000	PHYTOENE SYNTHASE	PSY	PSY1, OsPSY1		phytoene synthase 1, PSY1-like gene
Zm00001eb366610	103636445	LOC103636445	-1.06512	AT1G10940	Os01g0869900	Protein kinase superfamily protein	ASK1	OsSAPK4	Protein kinase	stress/ABA-activated protein kinase 4, Stress-Activated Protein Kinase 4	TO:0000095 - osmotic response sensitivity
Zm00001eb236830	107548100	LOC107548100	-1.07679	AT5G35680	Os02g0300700	Nucleic acid-binding, OB-fold-like protein	NA	OseIF1A-1		translation initiation factor 1A-1, eukaryotic initiation factor 1A-1
Zm00001eb403660	100279331	hemolysin	-1.09052	AT5G52790	Os03g0125800	CBS domain-containing protein with a domain of unknown function (DUF21)	NA	OsCBSDUF3, OsSTA88		cystathionine b-synthase domain containing protein OsCBSDUF3, CBS domain containing protein OsCBSDUF3
Zm00001eb190530	100502487	LOC100502487	-1.09426	AT1G76390	Os03g0657100	ARM repeat superfamily protein	NA	OsPUB24, PUB24		plant U-box-containing protein 24, U-box protein 24	TO:0002677 - brassinosteroid sensitivity
Zm00001eb291070	103630517	LOC103630517	-1.09856	AT1G79620	Os05g0486100	Leucine-rich repeat protein kinase family protein	NA	OsRPK1	LRR kinase	leucine-rich repeat receptor-like kinase 1	TO:0000615 - abscisic acid sensitivity, TO:0000207 - plant height, TO:0000163 - auxin sensitivity, TO:0002672 - auxin content, TO:0000656 - root development trait, TO:0000346 - tiller number
Zm00001eb418610	100196928	hsp82	-1.10205	AT5G52640	Os04g0107900	heat shock protein 90.1	ATHS83	Hsp90, OsHSP90.1		Heat shock protein 90.1	TO:0000259 - heat tolerance, TO:0000303 - cold tolerance
Zm00001eb260730	100273449	TIDP9204	-1.10581	AT3G07370	Os08g0113300	carboxyl terminus of HSC70-interacting protein	ATCHIP	OsPUB68		plant U-box-containing protein 68, U-box protein 68
Zm00001eb159470	100193590	umc2776	-1.12084	AT1G70790	Os02g0327000	Calcium-dependent lipid-binding (CaLB domain) family protein	NA	OsGAP1, GAP1		GTPase-activating protein 1	TO:0006001 - salt tolerance, TO:0000315 - bacterial disease resistance, TO:0000224 - iron sensitivity, TO:0000112 - disease resistance
Zm00001eb389820	100284878	LOC100284878	-1.12298	AT4G20070	Os06g0665500	allantoate amidohydrolase	AAH	OsAAH		allantoate amidohydrolase	TO:0000011 - nitrogen sensitivity
Zm00001eb233720	542166	pco063262	-1.12437	AT1G51680	Os02g0177600	4-coumarate:CoA ligase 1	4CL.1	Os4CL3, Os4CL2, Os4CL, 4CL2, 4CL		4-coumarate:coenzyme A ligase 3, 4-hydroxycinnamate CoA ligase 2	TO:0000160 - UV light sensitivity, TO:0000731 - lignin content, TO:0000733 - lignin biosynthesis trait, TO:0000011 - nitrogen sensitivity, TO:0000051 - stem strength
Zm00001eb402720	100191653	LOC100191653	-1.12639	AT3G51370	Os03g0137200	Protein phosphatase 2C family protein	NA	OsPP2C28, PP2C28, OsPP43		protein phosphatase 2C28, protein phosphatase 2C 28, protein phosphatase 43
Zm00001eb385100	100274015	LOC100274015	-1.1442	AT5G25900	Os06g0569500	GA requiring 3	ATKO1	OsKO4, OsKOL4, KOS1, CYP701A8, OsKO2		rice ent-kaurene oxidase4, cytochrome P450 701A8	TO:0002675 - gibberellic acid content, TO:0000145 - internode length, TO:0000207 - plant height
Zm00001eb312910	100191755	pco062034(27)	-1.15203	AT4G30960	Os09g0418500	SOS3-interacting protein 3	ATCIPK6	OsCIPK27	CIPKs	Putative CBL-interacting protein kinase 27
Zm00001eb075230	103646132	LOC103646132	-1.15297	AT3G61890	Os04g0541700	homeobox 12	ATHB-12	Oshox22, OsHox22		rice homeobox gene 22, Homeobox-leucine zipper protein HOX22, Homeodomain transcription factor HOX22, HD-ZIP protein HOX22
Zm00001eb123430	100282081	LOC100282081	-1.15817	AT2G30170	Os01g0164600	Protein phosphatase 2C family protein	NA	OsPP2C01, PP2C01, OsPP2C1, PP2C1, OsPP1, OsPBCP, PBCP	light	protein phosphatase 2C01, protein phosphatase 2C 01, protein phosphatase 2C1, protein phosphatase 2C 1, protein phosphatase 1, PHOTOSYSTEM II CORE PHOSPHATASE	TO:0000075 - light sensitivity
Zm00001eb188900	100283803	LOC100283803	-1.16929	AT3G51520	Os02g0714100	diacylglycerol acyltransferase family	NA	OsDGAT		diacylglycerolacetyl transferase
Zm00001eb204180	100272864	PYL9	-1.17121	AT1G01360	Os02g0255500	regulatory component of ABA receptor 1	PYL9	OsPYL/RCAR3, PYL3, OsPYL3, OsPYL10, PYL10, OsRCAR1, RCAR1		pyrabactin resistance-like 3, PYR1-like 10, pyrabactin resistance 1-like 10	TO:0000259 - heat tolerance, TO:0000615 - abscisic acid sensitivity, TO:0000303 - cold tolerance, TO:0000276 - drought tolerance, TO:0006001 - salt tolerance
Zm00001eb163990	103651681	LOC103651681	-1.19115	AT5G19160	Os11g0148200	TRICHOME BIREFRINGENCE-LIKE 11	TBL11	OsTBL22, TBL22		trichome birefringence-like 22
Zm00001eb382480	100282802	LOC100282802	-1.20148	AT3G18180	Os06g0470000	Glycosyltransferase family 61 protein	NA
Zm00001eb231540	100279867	LOC100279867	-1.20501	AT5G14760	Os02g0134400	L-aspartate oxidase	AO	OsLASPO		L-aspartate oxidase
Zm00001eb202040	103654608	LOC103654608	-1.20717	AT3G52430	Os11g0195500	alpha/beta-Hydrolases superfamily protein	ATPAD4	OsPAD4		phytoalexin deficient 4	TO:0000424 - brown planthopper resistance, TO:0000175 - bacterial blight disease resistance, TO:0002668 - jasmonic acid content, TO:0002670 - momilactone A content, TO:0000172 - jasmonic acid sensitivity
Zm00001eb018000	541677	pdlk1	-1.21758	AT3G06483	Os03g0370000	pyruvate dehydrogenase kinase	ATPDHK	Ospdhk1		pyruvate dehydrogenase kinase 1
Zm00001eb355810	100285589	umc2378	-1.24896	AT1G07570	Os05g0110900	Protein kinase superfamily protein	APK1	OsRLCK176	RLCKs	receptor-like cytoplasmic kinase 176	TO:0000315 - bacterial disease resistance, TO:0000439 - fungal disease resistance, TO:0000074 - blast disease, TO:0002677 - brassinosteroid sensitivity, TO:0000206 - leaf angle, TO:0000175 - bacterial blight disease resistance
Zm00001eb397190	103639280	gpm355	-1.25068	AT3G45640	Os03g0285800	mitogen-activated protein kinase 3	ATMAPK3	OsMSRMK2, OsMAPK5, OsMAP1, OsMPK3, OsBIMK1, OsMAPK2, MPK5, BIMK1, MAPK2, MAPK5, MPK3, OsMPK5, OsMAPK3, OsMAPK5b, MAPK3		multiple stress responsive MAP kinase 2, Mitogen-activated protein kinase 5, MAP kinase 5, Benzothiadiazole-induced MAP kinase 1, BTH-induced MAPK 1, MAP kinase 2, Multiple stress-responsive MAP kinase 2, MAP kinase 3	TO:0000175 - bacterial blight disease resistance, TO:0000424 - brown planthopper resistance, TO:0000276 - drought tolerance, TO:0002668 - jasmonic acid content, TO:0000172 - jasmonic acid sensitivity, TO:0006003 - oligosaccharide content, TO:0000273 - armyworm resistance, TO:0000615 - abscisic acid sensitivity, TO:0000112 - disease resistance, TO:0000173 - ethylene sensitivity, TO:0000163 - auxin…
Zm00001eb261920	100272659	LOC100272659	-1.25207	AT2G03590	Os12g0503000	ureide permease 1	ATUPS1	OsUPS1		ureide permease1	TO:0000011 - nitrogen sensitivity
Zm00001eb076070	100285545	LOC100285545	-1.28281	AT1G76800	Os04g0686800	Vacuolar iron transporter (VIT) family protein	NA			OsNodulin-like2, Nodulin-like2
Zm00001eb370960	100502167	WRKY111	-1.29862	AT3G58710	Os01g0750100	WRKY DNA-binding protein 69	ATWRKY69	OsWRKY13	WRKY	Rice WRKY gene13	TO:0000175 - bacterial blight disease resistance, TO:0000020 - black streak dwarf virus resistance
Zm00001eb133000	100273544	LOC100273544	-1.30335	AT5G62000	Os12g0479400	auxin response factor 2	ARF1-BP	OsARF24		auxin response factor-24, auxin response factor 24	TO:0000237 - water stress trait, TO:0000276 - drought tolerance, TO:0000043 - root anatomy and morphology trait
Zm00001eb121020	100286264	LOC100286264	-1.3243	AT4G33040	Os01g0194600	Thioredoxin superfamily protein	NA	OsGRX2	ROS	glutaredoxin 2
Zm00001eb319460	100273363	LOC100273363	-1.34867	AT4G38960	Os09g0527900	B-box type zinc finger family protein	NA	OsBBX29, OsDBB1, BBX29, DBB1, DLN230, OsDLN230		B-box-containing protein 29, DOUBLE B-BOX zinc finger gene 1, DOUBLE B-BOX 1, DLN repressor 230, DLN motif protein 230
Zm00001eb244770	100384475	siu50817b	-1.35187	AT4G08920	Os02g0573200	cryptochrome 1	ATCRY1	OsCRY1a, OsCRY1, CRY1a, CRY2		cryptochrome 1a, Blue-light-receptor cryptochrome 1	TO:0000601 - UV-B light sensitivity
Zm00001eb006890	103631862	LOC103631862	-1.36042	AT5G09410	Os03g0191000	ethylene induced calmodulin binding protein	CAMTA1			CaM-binding transcription factor homolog, OsCBT homolog, CBT homolog
Zm00001eb378470	103638146	LOC103638146	-1.38803	AT4G24050	Os06g0129100	NAD(P)-binding Rossmann-fold superfamily protein	NA			Retinol dehydrogenase 14	TO:0000074 - blast disease
Zm00001eb395600	606405	gols2	-1.39939	AT4G26250	Os03g0316200	galactinol synthase 6	AtGolS6	OsGolS1, GolS1, OsGolS2, GolS2		galactinol synthase 1, galactinol synthase 2	TO:0000168 - abiotic stress trait, TO:0000303 - cold tolerance, TO:0006001 - salt tolerance, TO:0000276 - drought tolerance, TO:0000615 - abscisic acid sensitivity
Zm00001eb247320	100303864	LOC100303864	-1.41098	AT5G63030	Os02g0618100	Thioredoxin superfamily protein	NA	OsGRX9, OsGrx_C2.1, Grx_C2.1	ROS	glutaredoxin 9	TO:0000465 - mineral and ion content related trait
Zm00001eb271420	100276046	LOC100276046	-1.43256	AT5G25770	Os06g0163200	alpha/beta-Hydrolases superfamily protein	NA	OsPOP11, POP11		Prolyl Oligopeptidase 11, PROLYL OLIGOPEPTIDASE 11
Zm00001eb009950	100280077	LOC100280077	-1.4545	AT1G49570	Os03g0235000	Peroxidase superfamily protein	NA	poxN, prx38, prxRPN, RPN, poxN/PRX38		Peroxidase N, class III peroxidase 38	TO:0000179 - biotic stress trait, TO:0000074 - blast disease
Zm00001eb078870	100281734	LOC100281734	-1.47341	AT3G28600	Os12g0431100	P-loop containing nucleoside triphosphate hydrolases superfamily protein	NA			OsAAA-ATPase4, OsAAA-ATPase 4, AAA-ATPase4
Zm00001eb004550	100273198	sfp4	-1.47777	AT3G51895	Os03g0161200	sulfate transporter 3;1	AST12	OsSultr3;2, OsSul3;2		sulphate transporter 3;2	TO:0000224 - iron sensitivity, TO:0006001 - salt tolerance, TO:0000276 - drought tolerance, TO:0000034 - chromium sensitivity, TO:0000653 - seed development trait
Zm00001eb003760	103631716	LOC103631716	-1.56545	AT3G44880	Os03g0146400	Pheophorbide a oxygenase family protein with Rieske [2Fe-2S] domain	ACD1	OsPAO, PAO, OsACD1		Pheophorbide a oxygenase, accelerated cell-death 1	TO:0000495 - chlorophyll content, TO:0000249 - leaf senescence
Zm00001eb203570	100279221	LOC100279221	-1.58963	AT2G20050	Os02g0281000	protein serine/threonine phosphatases;protein kinases;catalytics;cAMP-dependent protein kinase regulators;ATP binding;protein serine/threonine phosphatases	NA	OsPP23, PP23, PKG, OsPKG		Protein phosphatase 23, cGMP-Dependent Protein Kinase	TO:0000181 - seed weight, TO:0000590 - grain weight, TO:0000207 - plant height, TO:0000455 - seed set percent, TO:0000180 - spikelet fertility, TO:0000421 - pollen fertility, TO:0000145 - internode length, TO:0000430 - germination rate, TO:0000605 - hydrogen peroxide content, TO:0006001 - salt tolerance, TO:0000166 - gibberellic acid sensitivity
Zm00001eb275480	103629714	LOC103629714	-1.60498	AT4G24120	Os04g0542800	YELLOW STRIPE like 1	ATYSL1	OsYSL16, Os-YSL16, OsYs14		rice YSL (yellow stripe-like) gene 16, Probable metal-nicotianamine transporter YSL16, Protein YELLOW STRIPE LIKE 16, yellow stripe 1-like transporter 16, Yellow stripe-like16, Yellow Stripe1-Like 16	TO:0000421 - pollen fertility
Zm00001eb415590	103641254	LOC103641254	-1.60675	AT5G25530	Os08g0161900	DNAJ heat shock family protein	NA	OsDjB8		DnaJ domain protein B8
Zm00001eb220390	100273589	LOC100273589	-1.63129	AT4G36220	Os10g0512400	ferulic acid 5-hydroxylase 1	CYP84A1	OsF5H1, F5H1, OsCAld5H1, CAld5H1, CYP84A5, OsCYP84A5	lignin	ferulate 5-hydroxylase 1, Coniferaldehyde 5-hydroxylase 1	TO:0000731 - lignin content, TO:0000621 - inflorescence development trait, TO:0006036 - stem elongation, TO:0000180 - spikelet fertility, TO:0000576 - stem length, TO:0000733 - lignin biosynthesis trait
Zm00001eb250670	100276918	LOC100276918	-1.63526	AT1G63970	Os02g0680600	isoprenoid F	ISPF	OsMCS, MCS, IspF, OsIspF		2-C-methyl-D-erythritol 2, 4-cyclodiphosphate synthase, MECDP synthase	TO:0000326 - leaf color, TO:0000293 - chlorophyll-a content, TO:0000295 - chlorophyll-b content, TO:0000495 - chlorophyll content, TO:0002715 - chloroplast development trait, TO:0000496 - carotenoid content, TO:0000160 - UV light sensitivity
Zm00001eb290220	100502216	LOC100502216	-1.64949	AT5G58500	Os05g0472000	Protein of unknown function (DUF640)	LSH5	OsG1L8
Zm00001eb101170	100193377	umc2598	-1.65608	AT2G33750	Os09g0467400	purine permease 2	ATPUP2	OsPUP3		purine permease 3, PUP-type cytokinin transporter 3
Zm00001eb396710	100281868	PYL5	-1.67343	AT5G05440	Os03g0297600	Polyketide cyclase/dehydrase and lipid transport superfamily protein	PYL5	OsPYL/RCAR4, PYL4, OsPYL4, OsPYL6, PYL6		pyrabactin resistance-like 4, PYR1-like 6, pyrabactin resistance 1-like 6	TO:0000237 - water stress trait, TO:0000615 - abscisic acid sensitivity, TO:0000253 - seed dormancy, TO:0006001 - salt tolerance
Zm00001eb150630	100282760	umc2169	-1.67577	AT2G26930	Os01g0802100	4-(cytidine 5'-phospho)-2-C-methyl-D-erithritol kinase	ATCDPMEK	OsCMK, CMK, OsIspE, IspE		4-(cytidine 5'-diphospho)-2-C-methyl-D-erythritol kinase, CDP-ME kinase, 4-diphosphocytidyl-2-C-methyl-D-erythritol kinase, green-revertible yellow leaf 340	TO:0000455 - seed set percent, TO:0002715 - chloroplast development trait, TO:0000592 - 1000-dehulled grain weight, TO:0000180 - spikelet fertility, TO:0000040 - panicle length, TO:0000456 - spikelet number, TO:0000152 - panicle number, TO:0000207 - plant height, TO:0000496 - carotenoid content, TO:0000495 - chlorophyll content, TO:0000293 - chlorophyll-a content, TO:0000295 - chlorophyll-b conte…
Zm00001eb236120	103626839	LOC103626839	-1.69722	AT1G55580	Os02g0197300	GRAS family transcription factor	LAS	OsGRAS-7, OsGRAS7, GRAS-7		GRAS protein 7
Zm00001eb319390	100502166	HB128	-1.70575	AT3G61890	Os09g0528200	homeobox 12	ATHB-12	Oshox6, OsHox6		rice homeobox gene 6, Homeobox-leucine zipper protein HOX6, Homeodomain transcription factor HOX6, HD-ZIP protein HOX6
Zm00001eb303800	100281849	LOC100281849	-1.73723	AT2G32270	Os07g0232800	zinc transporter 3 precursor	ZIP3	OsZIP8, OsZIP1		zinc transporter 8, Zrt-Irt-like protein 8, Zinc-regulated transporter, Iron-regulated transporter-like protein 8, Zinc and Iron-regulated Protein 8
Zm00001eb162210	542609	pco131778b	-1.75487	AT4G32940	Os01g0559600	gamma vacuolar processing enzyme	GAMMA-VPE	OsVPE2, VPE2, OsaLeg1, aLeg1		vacuolar processing enzyme 2, legumain 1	TO:0000249 - leaf senescence, TO:0000164 - stress trait, TO:0000615 - abscisic acid sensitivity, TO:0000429 - salt sensitivity
Zm00001eb281410	100127538	ZCN11	-1.76701	AT1G18100	Os06g0498800	PEBP (phosphatidylethanolamine-binding protein) family protein	E12A11	OsMFT1, MFT1		MFT-like gene 1, MOTHER OF FT AND TFL1	TO:0000373 - inflorescence anatomy and morphology trait, TO:0000456 - spikelet number, TO:0000137 - days to heading
Zm00001eb032520	100273384	LOC100273384	-1.78779	AT4G11650	Os12g0628600	osmotin 34	ATOSM34	OsPR5, Pir2, PR-5, PR5-1	PR5	pathogenesis-related gene 5, Pathogenesis-related protein class 5 gene	TO:0000175 - bacterial blight disease resistance
Zm00001eb038880	100273265	LOC100273265	-1.80319	AT5G23950	Os09g0571200	Calcium-dependent lipid-binding (CaLB domain) family protein	NA	OsC2DP	Ca2+	C2 domain-containing protein	TO:0006001 - salt tolerance, TO:0000526 - sodium concentration
Zm00001eb172590	100216884	pco101103(181)	-1.80458	AT3G47420	Os08g0156600	phosphate starvation-induced gene 3	ATPS3	OsVPE2		vacuolar Pi efflux transporter 2, vacuolar phosphate efflux transporter 2
Zm00001eb111670	100272926	LOC100272926	-1.81321	AT2G39050	Os07g0683600	hydroxyproline-rich glycoprotein family protein	NA	OsEULD2, EULD2		EUL-related lectin D2	TO:0000615 - abscisic acid sensitivity, TO:0000172 - jasmonic acid sensitivity, TO:0000276 - drought tolerance, TO:0006001 - salt tolerance, TO:0000424 - brown planthopper resistance, TO:0000175 - bacterial blight disease resistance, TO:0000074 - blast disease
Zm00001eb196180	100191783	LOC100191783	-1.81586	AT5G13740	Os12g0133100	zinc induced facilitator 1	ZIF1	OsZIFL12, OsVMT, VMT, OsVMT/OsZIFL12		zinc-induced facilitator-like 12, VACUOLAR MUGINEIC ACID TRANSPORTER
Zm00001eb040280	100280446	CKX10	-1.82006	AT5G21482	Os08g0460600	cytokinin oxidase 7	ATCKX5	OsCKX11	cytokinin signaling	cytokinin oxidase 11	TO:0000167 - cytokinin sensitivity
Zm00001eb001900	100274981	LOC100274981	-1.835	AT5G52790	Os03g0125800	CBS domain-containing protein with a domain of unknown function (DUF21)	NA	OsCBSDUF3, OsSTA88		cystathionine b-synthase domain containing protein OsCBSDUF3, CBS domain containing protein OsCBSDUF3
Zm00001eb119100	100194284	pco104496	-1.84216	AT1G53023	Os01g0233900	Ubiquitin-conjugating enzyme family protein	NA	OsUBC37		Ubiquitin-conjugating enzyme 37	TO:0000615 - abscisic acid sensitivity, TO:0000163 - auxin sensitivity, TO:0000653 - seed development trait
Zm00001eb433950	100240691	Atg4b	-1.85032	AT2G44140	Os04g0682000	Peptidase family C54 protein	NA	Atg4, OsAtg4, APG4, Atg4b, OsATG4b		autophagy 4, AUTOPHAGY RELATED4b, autophagy 4b, AUTOPHAGY ASSOCIATED GENE 4B
Zm00001eb006940	100281229	IDP871	-1.85291	AT5G64990	Os03g0191400	RAB GTPase homolog H1A	AtRABH1a	OsRab6B2, Rab6B2, OsRab6a, Rab6a		small GTP-binding protein OsRab6B2	TO:0000207 - plant height, TO:0000495 - chlorophyll content, TO:0000227 - root length, TO:0000656 - root development trait, TO:0000571 - shoot fresh weight, TO:0000224 - iron sensitivity, TO:0000578 - root fresh weight, TO:0000457 - total biomass yield
Zm00001eb361620	100191227	LOC100191227	-1.86213	AT1G17710	Os01g0720400	Pyridoxal phosphate phosphatase-related protein	NA	OsACP1, ACP1		acid phosphatase 1
Zm00001eb400570	100191524	pco124760	-1.87214	AT4G33920	Os03g0207400	Protein phosphatase 2C family protein	NA	OsPP2C29, PP2C29, OsPP46		protein phosphatase 2C29, protein phosphatase 2C 29, protein phosphatase 46
Zm00001eb344160	103635353	LOC103635353	-1.87716	AT2G46400	Os11g0685700	WRKY DNA-binding protein 46	ATWRKY46	OsWRKY61, OsWRKY103, WRKY103	WRKY	Rice WRKY gene61	TO:0000276 - drought tolerance, TO:0006001 - salt tolerance
Zm00001eb235510	100286123	gpm254	-1.88976	AT5G11260	Os02g0203000	Basic-leucine zipper (bZIP) transcription factor family protein	HY5	OsbZIP18		b-ZIP transcription factor 18
Zm00001eb013100	100272353	gpm443	-1.89848	AT3G45640	Os03g0285800	mitogen-activated protein kinase 3	ATMAPK3	OsMSRMK2, OsMAPK5, OsMAP1, OsMPK3, OsBIMK1, OsMAPK2, MPK5, BIMK1, MAPK2, MAPK5, MPK3, OsMPK5, OsMAPK3, OsMAPK5b, MAPK3	MAPK	multiple stress responsive MAP kinase 2, Mitogen-activated protein kinase 5, MAP kinase 5, Benzothiadiazole-induced MAP kinase 1, BTH-induced MAPK 1, MAP kinase 2, Multiple stress-responsive MAP kinase 2, MAP kinase 3	TO:0000175 - bacterial blight disease resistance, TO:0000424 - brown planthopper resistance, TO:0000276 - drought tolerance, TO:0002668 - jasmonic acid content, TO:0000172 - jasmonic acid sensitivity, TO:0006003 - oligosaccharide content, TO:0000273 - armyworm resistance, TO:0000615 - abscisic acid sensitivity, TO:0000112 - disease resistance, TO:0000173 - ethylene sensitivity, TO:0000163 - auxin…
Zm00001eb282840	107546771	LOC107546771	-2.03879	AT5G26170	Os05g0183100	WRKY DNA-binding protein 50	ATWRKY50	OsWRKY67	WRKY	Rice WRKY gene67	TO:0000477 - panicle blast disease resistance, TO:0000175 - bacterial blight disease resistance, TO:0000468 - leaf blast disease resistance, TO:0000303 - cold tolerance
Zm00001eb178810	100383631	sfp2	-2.0749	AT1G22150	Os08g0406400	sulfate transporter 1;3	SULTR1;3	OsSultr1;3, OsSul1;3		sulphate transporter 1;3	TO:0006001 - salt tolerance, TO:0000276 - drought tolerance, TO:0000653 - seed development trait, TO:0000034 - chromium sensitivity, TO:0000303 - cold tolerance
Zm00001eb369710	103636584	LOC103636584	-2.09073	AT4G37140	Os01g0787600	alpha/beta-Hydrolases superfamily protein	ATMES20	OsPOP4, POP4		Prolyl Oligopeptidase 4, PROLYL OLIGOPEPTIDASE 4
Zm00001eb268690	100272976	LOC100272976	-2.10035	AT5G41410	Os06g0108900	POX (plant homeobox) family protein	BEL1	BEL1, OsBEL, BEL		bell-like homeodomain protein, BELL1 homolog
Zm00001eb150470	100382469	LOC100382469	-2.12458	AT2G30140	Os01g0805400	UDP-Glycosyltransferase superfamily protein	NA	OsEnS-18, EnS-18, Os6		endosperm-specific gene 18, cytokinin glycosyltransferase
Zm00001eb340690	100216948	LOC100216948	-2.26015	AT3G17180	Os01g0332800	serine carboxypeptidase-like 33	scpl33	OsSCP3		Serine carboxypeptidase 3
Zm00001eb001780	100383535	LOC100383535	-2.26902	AT5G24010	Os03g0124200	Protein kinase superfamily protein	NA	OsCrRLK1L6	CrRLK	Catharanthus roseus receptor-like kinase1-like kinase 6
Zm00001eb061880	103644222	LOC103644222	-2.27352	AT3G57520	Os03g0808900	seed imbibition 2	AtSIP2				TO:0002649 - pesticide sensitivity
Zm00001eb073510	100193704	cl35113_1	-2.30924	AT4G11810	Os04g0573000	Major Facilitator Superfamily with SPX (SYG1/Pho81/XPR1) domain-containing protein	NA	OsSPX-MFS1, SPX-MFS1		SPX-MFS protein 1	TO:0002661 - seed maturation
Zm00001eb091200	100382449	LOC100382449	-2.31824	AT1G44170	Os11g0186200	aldehyde dehydrogenase 3H1	ALDH3H1	OsALDH3H2		Aldehyde dehydrogenase 3H2
Zm00001eb326990	100037799	Bk2L6	-2.32177	AT3G02210	Os07g0604300	COBRA-like protein 1 precursor	COBL1	OsBC1L6, OsPCS8, PCS8		BRITTLE CULM1-like 6, Brittle Culm 1-like 6, Phytochelatin synthase 8	TO:0000351 - zinc sensitivity
Zm00001eb245250	100281564	LOC100281564	-2.39002	AT3G21670	Os02g0580900	Major facilitator superfamily protein	NA	OsNRT1.3A		nitrate transporter 1.3A
Zm00001eb356430	100281947	LOC100281947	-2.39454	AT5G26170	Os05g0537100	WRKY DNA-binding protein 50	ATWRKY50	OsWRKY7	WRKY	Rice WRKY gene7	TO:0000276 - drought tolerance, TO:0006001 - salt tolerance, TO:0000303 - cold tolerance, TO:0000175 - bacterial blight disease resistance
Zm00001eb137880	100384255	LOC100384255	-2.41276	AT5G08080	Os06g0168500	syntaxin of plants 132	ATSYP132	OsSYP131		Syntaxin of Plants131
Zm00001eb142630	100282468	LOC100282468	-2.4165	AT1G01630	Os01g0926800	Sec14p-like phosphatidylinositol transfer family protein	NA			sec14 like protein
Zm00001eb019160	100280301	LOC100280301	-2.43656	AT2G27920	Os03g0393700	serine carboxypeptidase-like 51	SCPL51	OsSCP18		Serine carboxypeptidase 18
Zm00001eb346880	100193498	LOC100193498	-2.43991	AT5G26170	Os05g0183100	WRKY DNA-binding protein 50	ATWRKY50	OsWRKY67	WRKY	Rice WRKY gene67	TO:0000477 - panicle blast disease resistance, TO:0000175 - bacterial blight disease resistance, TO:0000468 - leaf blast disease resistance, TO:0000303 - cold tolerance
Zm00001eb072720	100279951	LOC100279951	-2.49661	AT3G51480	Os04g0585200	glutamate receptor 3.6	ATGLR3.6	OsGLR3.2, GLR3.2, OsGLR3.1		Glutamate receptor 3.1, Ligand-gated ion channel 3.1, Glutamate receptor homolog 3.2, GLUTAMATE RECEPTOR-LIKE 3.1	TO:0000276 - drought tolerance, TO:0006001 - salt tolerance
Zm00001eb152160	542740	gst8	-2.56434	AT3G03190	Os01g0353400	glutathione S-transferase F11	ATGSTF11	OsGSTF11, OsGST4			TO:0002657 - oxidative stress, TO:0006001 - salt tolerance
Zm00001eb299420	542255	rs1	-2.65972	AT4G08150	Os07g0129700	KNOTTED-like from Arabidopsis thaliana	BP	OSH15, OsH15, OSKN3, Oskn3, HOS3, D6, d6, OSH15/Oskn3, HB253, H15, OsKNOX3, KNOX3		Oryza sativa homeobox15, Rice KNOX gene-15, Homeobox protein knotted-1-like 12, Homeobox protein OSH15, Homeobox protein HOS3, Homeobox protein knotted-1-like 3, KNOX PROTEIN 3, Oryza sativa Homeobox 15	TO:0000492 - leaf shape, TO:0000145 - internode length
Zm00001eb248170	100279206	LOC100279206	-2.74287	AT5G23210	Os02g0634700	serine carboxypeptidase-like 34	SCPL34	OsSCP8		Serine carboxypeptidase 8
Zm00001eb076900	103646192	LOC103646192	-2.80029	AT1G65730	Os04g0524500	YELLOW STRIPE like 7	YSL7	OsYSL13, OsYs12		rice YSL (yellow stripe-like) gene 13, Probable metal-nicotianamine transporter YSL13, Protein YELLOW STRIPE LIKE 13, yellow stripe 1-like transporter 13
Zm00001eb106380	103647730	LOC103647730	-2.88155	AT4G21230	Os07g0538400	cysteine-rich RLK (RECEPTOR-like protein kinase) 27	CRK27	OsRLCK235	RLCK	Receptor-like Cytoplasmic Kinase 235	TO:0000074 - blast disease, TO:0000175 - bacterial blight disease resistance
Zm00001eb385070	103638615	LOC103638615	-2.95433	AT5G25900	Os06g0569500	GA requiring 3	ATKO1	OsKO4, OsKOL4, KOS1, CYP701A8, OsKO2	GA signaling	rice ent-kaurene oxidase4, cytochrome P450 701A8	TO:0002675 - gibberellic acid content, TO:0000145 - internode length, TO:0000207 - plant height
Zm00001eb121900	542723	hsp18f	-3.02078	AT5G12020	Os01g0184100	17.6 kDa class II heat shock protein	HSP17.6II	OsHSP18.0-CII, Oshsp18.0-CII, OsHSP18.0, OsHSP18.2		18.0 kDa class II heat shock protein, small heat shock protein 18.0	TO:0006001 - salt tolerance, TO:0000430 - germination rate, TO:0000250 - vigor related trait, TO:0002661 - seed maturation, TO:0000435 - seed longevity, TO:0000175 - bacterial blight disease resistance, TO:0000259 - heat tolerance
Zm00001eb254960	103627746	LOC103627746	-3.15351	AT5G48100	Os02g0749700	Laccase/Diphenol oxidase family protein	ATLAC15	OsLAC10		laccase 10	TO:0000021 - copper sensitivity, TO:0000276 - drought tolerance, TO:0006001 - salt tolerance, TO:0000034 - chromium sensitivity
Zm00001eb429330	100126972	R-S	-3.19161	AT5G41315	Os04g0557800	basic helix-loop-helix (bHLH) DNA-binding superfamily protein	GL3	Ra*, bhlh13, OsbHLH013, OsbHLH13, Ra, OSB1, Ra1, OsGL3A, GL3A, OsB2, OsMYC7, MYC7		Rice R gene (Anthocyanin biosynthesis) : a, basic helix loop helix 13, Rice R gene (Anthocyanin biosynthesis)-a, GLABRA3A, GLABRA 3A, Myelocytomatosis oncogene transcription factor 7	TO:0000190 - seed coat color, TO:0000487 - endosperm color, TO:0000071 - anthocyanin content
Zm00001eb138820	103650635	LOC103650635	-3.19442	AT5G09220	Os12g0181500	amino acid permease 2	AAP2	OsAAP11A, OsAAP16, AAP16		amino acid permease 11A, amino acid permease 16, amino acid/auxin permease 16
Zm00001eb413210	103641117	LOC103641117	-3.47243	AT3G04150	Os12g0155000	RmlC-like cupins superfamily protein	NA	OsGLP12-4
Zm00001eb247370	541726	LOC541726	-3.54147	AT3G24310	Os02g0618400	myb domain protein 305	ATMYB71	OsMPS		MULTIPASS
Zm00001eb235950	103626827	LOC103626827	-3.63345	AT5G59810	Os02g0198700	Subtilase family protein	ATSBT5.4	OsSub12, SUB12		Subtilisin 12, SUBTILISIN 12
Zm00001eb117820	100283277	gnarley1	-3.73053	AT4G08150	Os07g0129700	KNOTTED-like from Arabidopsis thaliana	BP	OSH15, OsH15, OSKN3, Oskn3, HOS3, D6, d6, OSH15/Oskn3, HB253, H15, OsKNOX3, KNOX3		Oryza sativa homeobox15, Rice KNOX gene-15, Homeobox protein knotted-1-like 12, Homeobox protein OSH15, Homeobox protein HOS3, Homeobox protein knotted-1-like 3, KNOX PROTEIN 3, Oryza sativa Homeobox 15	TO:0000492 - leaf shape, TO:0000145 - internode length
Zm00001eb430000	100037740	LOC100037740	-3.85109	AT1G16490	Os04g0594100	myb domain protein 58	ATMYB58	OsMYB58/63, OsMYB58, OsMYB63, MYB58/63, MYB58, MYB63, OsMYB58/63b, MYB58/63b		myb transcription factor 58/63, transcription factor MYB58/63
Zm00001eb293310	100280972	umc2170	-3.86154	AT2G42750	Os05g0529700	DNAJ heat shock N-terminal domain-containing protein	NA	OsDjC50		DnaJ domain protein C50, rice DJC82 homolog
Zm00001eb025550	100191502	LOC100191502	-3.89988	AT2G22960	Os10g0101200	alpha/beta-Hydrolases superfamily protein	NA	OsSCP45, OsSCP46, SCP46		Serine carboxypeptidase 45, Serine carboxypeptidase 46
Zm00001eb284520	103630156	LOC103630156	-4.03828	AT2G35770	Os05g0268500	serine carboxypeptidase-like 28	scpl28	OsEnS-75, OsSCP27, OsSCP28, SCP28		endosperm-specific gene 75, Serine carboxypeptidase 27, Serine carboxypeptidase 28
Zm00001eb362690	100274449	LOC100274449	-4.10476	AT2G03370	Os01g0956200	Glycosyltransferase family 61 protein	NA				TO:0002649 - pesticide sensitivity
Zm00001eb194370	732839	lac3	-4.27396	AT5G48100	Os02g0749700	Laccase/Diphenol oxidase family protein	ATLAC15	OsLAC10	ROS	laccase 10	TO:0000021 - copper sensitivity, TO:0000276 - drought tolerance, TO:0006001 - salt tolerance, TO:0000034 - chromium sensitivity
Zm00001eb167720	103652814	LOC103652814	-4.45894	AT3G04720	Os11g0591800	pathogenesis-related 4	HEL	OsPR4d	PR4	pathogenesis-related protein 4d, PR protein 4d
Zm00001eb146910	103650969	LOC103650969	-4.5047	AT2G35460	Os01g0864500	Late embryogenesis abundant (LEA) hydroxyproline-rich glycoprotein family	NA	OsSDS1		salt and drought sensitive gene 1	TO:0000276 - drought tolerance, TO:0006001 - salt tolerance
Zm00001eb167690	103652813	LOC103652813	-5.40655	AT3G04720	Os11g0592200	pathogenesis-related 4	HEL	OsPR4, OsPR4a, PR4a, OsPR-4	PR4	pathogenesis-related gene 4, pathogenesis-related type 4, pathogenesis-related protein 4a, PR protein 4a
Zm00001eb409700	100273207	LOC100273207	-5.7377	AT3G12120	Os07g0416900	fatty acid desaturase 2	FAD2	OsFAD2-3, FAD2-3, OsaFAD2-2, FAD2-2		fatty acid desaturase 2-3, microsomal delta-12 fatty acid desaturase2-3
Zm00001eb167710	100191593	pco080661a	-5.74716	AT3G04720	Os11g0591800	pathogenesis-related 4	HEL	OsPR4d	PR4	pathogenesis-related protein 4d, PR protein 4d
Zm00001eb154780	100384481	LOC100384481	-7.64119	AT1G16670	Os12g0611100	Protein kinase superfamily protein	NA	OsRLCK373	RLCK	Receptor-like Cytoplasmic Kinase 373	TO:0006001 - salt tolerance, TO:0000653 - seed development trait, TO:0000621 - inflorescence development trait, TO:0000276 - drought tolerance, TO:0000074 - blast disease
Zm00001eb032580	100284970	cl1774_-2(594)	-8.0122	AT4G11650	Os12g0628600	osmotin 34	ATOSM34	OsPR5, Pir2, PR-5, PR5-1	PR5	pathogenesis-related gene 5, Pathogenesis-related protein class 5 gene	TO:0000175 - bacterial blight disease resistance
Zm00001eb032580	103640644	LOC103640644	-9.61698	AT4G11650	Os12g0628600	osmotin 34	ATOSM34	OsPR5, Pir2, PR-5, PR5-1	PR5	pathogenesis-related gene 5, Pathogenesis-related protein class 5 gene	TO:0000175 - bacterial blight disease resistance
Zm00001eb141540	100037765	geb1	-11.425	AT4G16260	Os01g0940700	Glycosyl hydrolase superfamily protein	NA	OsPR2, PR2, OsGlu1, Glu1	PR2	beta-1, 3-glucanase, pathogenesis-related protein 2	TO:0000112 - disease resistance

## Sheet: 6 hpi
name	maize	gene_symbol	diffexp_log2fc_DTE_6h.vs.TE_6h	Arabidopsis gene	Oryza.sativa gene ID	annotation_ATR	gene_names_ATR	rice gene.symbol	classification	Gene.name.synonym.s._rice	Trait.Ontology_rice
Zm00001eb150400	100281583	LOC100281583	9.79468	AT2G26850	Os01g0806200	F-box family protein	NA	Fbox45	programmed cell death	F-box protein 45
Zm00001eb391720	100281269	LOC100281269	4.14545	AT3G30775	Os10g0550900	Methylenetetrahydrofolate reductase family protein	AtPOX	ProDH	programmed cell death	Proline dehydrogenase
Zm00001eb122890	103649694	LOC103649694	3.59174	AT3G01550	Os01g0172100	phosphoenolpyruvate (pep)/phosphate translocator 2	AtPPT2	PPT3	photosynthesis
Zm00001eb261440	100273455	cl217_2b	1.9104	AT3G01760	Os08g0127100	Transmembrane amino acid transporter family protein	NA	LHT1	grotwh and yield	Histidine Transporter, lysine and histidine transporter 1, lysine-histidine-like transporter 1, Lysine/Histidine transporter 1	TO:0000447 - filled grain number, TO:0000455 - seed set percent, TO:0000371 - yield trait, TO:0000396 - grain yield, TO:0000207 - plant height, TO:0000576 - stem length, TO:0000346 - tiller number, TO:0000227 - root length
Zm00001eb281180	100280551	LOC100280551	1.66881	AT3G01190	Os06g0490400	Peroxidase superfamily protein	NA	PRX80	programmed cell death	class III peroxidase 80
Zm00001eb410900	103640983	LOC103640983	1.60332	AT3G07040	Os12g0500500	NB-ARC domain-containing disease resistance protein	RPM1	RPM1	programmed cell death
Zm00001eb304280	100501436	LOC100501436	1.41443	AT3G62110	Os07g0245200	Pectin lyase-like superfamily protein	NA	PGL27	programmed cell death	Polygalacturonases-Like 27, PG-like 27, Polygalacturonase (PG), an important pectolytic glycanase, has been primarily implicated in the softening of fruit during ripening
Zm00001eb267050	100283433	IDP105	1.35733	AT1G20850	Os01g0971400	xylem cysteine peptidase 2	XCP2	XCP2	programmed cell death
Zm00001eb078730	100283098	LOC100283098	1.29566	AT3G54420	Os04g0494100	homolog of carrot EP3-3 chitinase	ATCHITIV	Chia4a/PR3	chitinase/PR3	Chitinase5, Chitinase 5, Pathogenesis related (PR)-3 chitinase 5, Pathogenesis related-3 chitinase 5, PR-3 chitinase 5, Class IV chitinase a, Chitinase IVa, Endochitinase A	TO:0000021 - copper sensitivity
Zm00001eb004670	100280131	LOC100280131	-1.81612	AT3G63350	Os03g0161900	winged-helix DNA-binding transcription factor family protein	AtHSFA7B	HsfA2d	light	Heat stress transcription factor A2d, Heat stress transcription factor A-2d, Heat stress transcription factor 8, Heat stress transcription factor 7	TO:0000075 - light sensitivity, TO:0002693 - gravity response trait, TO:0000567 - tiller angle
Zm00001eb154780	100384481	LOC100384481	-4.48724	AT1G16670	Os12g0611100	Protein kinase superfamily protein	NA	RLCK373	blast disease	Receptor-like Cytoplasmic Kinase 373	TO:0006001 - salt tolerance, TO:0000653 - seed development trait, TO:0000621 - inflorescence development trait, TO:0000276 - drought tolerance, TO:0000074 - blast disease
